# Supplementary material for: PIDA-mediated α-C–H functionalization of enaminones: the synthesis of thiocyano enaminones and chromones in water
Source: Royal Society of Chemistry journal article supplement (doi:10.1039/c9nj04580e), 2019-01-01

# **PIDA-Mediated $\alpha$ -C-H Functionalization of Enaminones: Synthesis of Thiocyano Enaminones and Chromones in Water**

Zan Yang, Liping Hu, Ting Cao, An Li, Lijun Li, Tao Yang\*, and Congshan

Zhou\*

College of Chemistry and Chemical Engineering, Hunan Institute of Science and

Technology, Yueyang 414006, China

[zhoucongsh@126.com](mailto:zhoucongsh@126.com) and [yangtaozcs@126.com](mailto:yangtaozcs@126.com)

## Experimental:

$^1\text{H}$  (400 MHz),  $^{13}\text{C}$  (101 MHz) spectra were recorded on a Bruker 400MHz spectrometer in  $\text{CDCl}_3$  using TMS as internal standard. HRMS was recorded on a Bruker micrOTOF-Q II. Reagents and solvents used were mostly AR grade from Adamas-beta® and Energy Chemical. Silica gel coated plates were used for TLC. Melting points were tested in X-4 instrument without correcting the temperature.

## Typical Procedure.

The mixture of enaminone **1** (0.2 mmol), KSCN (0.4 mmol), PIDA (0.22 mmol),  $\text{H}_2\text{O}$  (1 mL) was stirred at r.t. for 1 h until the reaction was complete (TLC). After, the reaction mixture was diluted with EtOAc (20 mL). The obtained top organic layer was dried with anhydrous  $\text{Na}_2\text{SO}_4$ . The mixture was concentrated in vacuo and the residue was purified by column chromatography on silica gel (PE : EA = 4:1~1:1) to afford pure product.

## Characteristic Data.

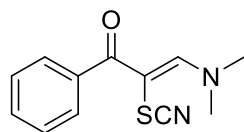

**(Z)-3-(dimethylamino)-1-phenyl-2-thiocyanatoprop-2-en-1-one (2a)**.<sup>1</sup> Yellow solid.  $^1\text{H}$  NMR (400 MHz,  $\text{CDCl}_3$ )  $\delta$  7.66 (s, 1H), 7.59 – 7.36 (m, 5H), 3.39 (brs, 6H).  $^{13}\text{C}$  NMR (101 MHz,  $\text{CDCl}_3$ )  $\delta$  192.9, 158.5, 139.8, 130.5, 128.3, 128.1, 113.4, 87.4.

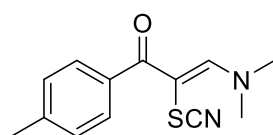

**(Z)-3-(dimethylamino)-2-thiocyanato-1-(p-tolyl)prop-2-en-1-one (2b)**.<sup>1</sup> Yellow solid.  $^1\text{H}$  NMR (400 MHz,  $\text{CDCl}_3$ )  $\delta$  7.66 (s, 1H), 7.45 (,  $J = 7.8$  Hz, 2H), 7.22 (,  $J = 7.6$  Hz, 2H), 3.38 (brs, 6H), 2.40 (s, 3H).  $^{13}\text{C}$  NMR (101 MHz,  $\text{CDCl}_3$ )  $\delta$  192.9, 158.8, 140.5, 136.9, 129.0, 128.4, 113.4, 87.4, 21.6.

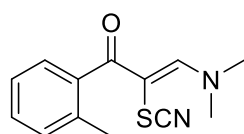

**(Z)-3-(dimethylamino)-2-thiocyanato-1-(o-tolyl)prop-2-en-1-one (2c)**. Yellow solid, mp 135-138 °C.  $^1\text{H}$  NMR (400 MHz,  $\text{CDCl}_3$ )  $\delta$  7.50 (s, 1H), 7.33 – 7.25 (m, 1H), 7.25 – 7.17 (m, 2H), 7.13

(d,  $J = 7.4$  Hz, 1H), 3.53 (s, 3H), 3.14 (s, 3H), 2.27 (s, 3H).  $^{13}\text{C}$  NMR (101 MHz,  $\text{CDCl}_3$ )  $\delta$  194.0, 158.3, 139.9, 134.9, 130.7, 129.1, 126.4, 125.5, 113.1, 88.5, 19.2. HRMS (ESI-TOF)  $m/z$  calcd for  $\text{C}_{13}\text{H}_{14}\text{N}_2\text{OS}$   $[\text{M}+\text{H}]^+$  246.0824, found 246.0817.

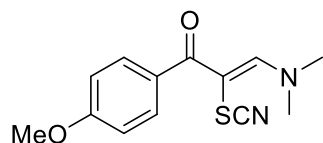

**(Z)-3-(dimethylamino)-1-(4-methoxyphenyl)-2-thiocyanatoprop-2-en-1-one (2d).** Yellow solid, mp 85-87 °C.  $^1\text{H}$  NMR (400 MHz,  $\text{CDCl}_3$ )  $\delta$  7.67 (s, 1H), 7.53 (d,  $J = 8.7$  Hz, 2H), 6.92 (d,  $J = 8.7$  Hz, 2H), 3.86 (s, 3H), 3.39 (s, 6H).  $^{13}\text{C}$  NMR (101 MHz,  $\text{CDCl}_3$ )  $\delta$  192.1, 161.6, 158.2, 131.9, 130.8, 130.5, 113.5, 87.1, 55.4. HRMS (ESI-TOF)  $m/z$  calcd for  $\text{C}_{13}\text{H}_{14}\text{N}_2\text{O}_2\text{S}$   $[\text{M}+\text{H}]^+$  262.0770, found 262.0765.

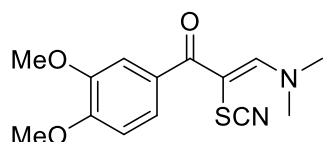

**(Z)-1-(3,4-dimethoxyphenyl)-3-(dimethylamino)-2-thiocyanatoprop-2-en-1-one (2e).** Yellow solid, mp 76-78 °C.  $^1\text{H}$  NMR (400 MHz,  $\text{CDCl}_3$ )  $\delta$  7.78 (s, 1H), 7.46 (d,  $J = 8.0$  Hz, 1H), 7.37 (s, 1H), 6.93 (d,  $J = 8.3$  Hz, 1H), 3.96 (s, 3H), 3.94 (s, 3H), 3.23 (s, 6H).  $^{13}\text{C}$  NMR (101 MHz,  $\text{CDCl}_3$ )  $\delta$  185.6, 152.3, 150.0, 149.0, 131.2, 128.9, 122.8, 111.3, 110.2, 77.5, 77.4, 77.2, 76.8, 56.2, 56.1. HRMS (ESI-TOF)  $m/z$  calcd for  $\text{C}_{14}\text{H}_{16}\text{N}_2\text{O}_3\text{S}$   $[\text{M}+\text{H}]^+$  292.0876, found 292.0882.

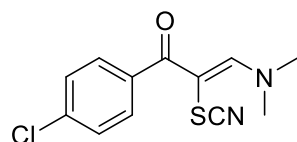

**(Z)-1-(4-chlorophenyl)-3-(dimethylamino)-2-thiocyanatoprop-2-en-1-one (2f).**<sup>1</sup> Yellow solid.  $^1\text{H}$  NMR (400 MHz,  $\text{CDCl}_3$ )  $\delta$  7.64 (s, 1H), 7.47 – 7.39 (m, 4H), 3.40 (brs, 6H).  $^{13}\text{C}$  NMR (101 MHz,  $\text{CDCl}_3$ )  $\delta$  191.3, 158.2, 138.1, 136.2, 129.5, 128.4, 113.1, 86.8.

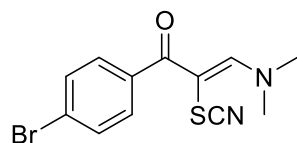

**(Z)-1-(4-bromophenyl)-3-(dimethylamino)-2-thiocyanatoprop-2-en-1-one (2g).** Yellow solid, mp 131-132 °C.  $^1\text{H}$  NMR (400 MHz,  $\text{CDCl}_3$ )  $\delta$  7.59 (s, 1H), 7.49 (d,  $J = 8.4$  Hz, 2H), 7.31 (d,  $J = 8.3$  Hz, 2H), 3.34 (brs, 6H).  $^{13}\text{C}$  NMR (101 MHz,  $\text{CDCl}_3$ )  $\delta$  191.9, 158.3, 138.6, 131.5, 129.7, 124.9, 113.2, 86.9. HRMS (ESI-TOF)  $m/z$  calcd for  $\text{C}_{12}\text{H}_{11}\text{BrN}_2\text{OS}$   $[\text{M}+\text{H}]^+$  309.9770, found 309.9765.

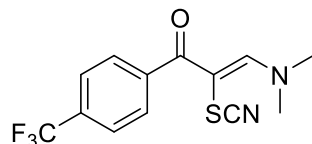

**(Z)-3-(dimethylamino)-2-thiocyanato-1-(4-(trifluoromethyl)phenyl)prop-2-en-1-one (2h).**

Yellow solid, mp 65-66 °C. <sup>1</sup>H NMR (400 MHz, CDCl<sub>3</sub>) δ 7.82 – 7.64 (m, 4H), 7.57 (t, *J* = 7.7 Hz, 1H), 3.41 (d, *J* = 59.0 Hz, 6H). <sup>13</sup>C NMR (101 MHz, CDCl<sub>3</sub>) δ 191.6, 158.4, 140.6, 131.2, 130.9, 130.6, 128.9, 127.1, 127.0, 127.0, 127.0, 125.1, 124.9, 124.9, 124.9, 124.8, 122.4, 113.1, 86.6. <sup>19</sup>F NMR (376 MHz, CDCl<sub>3</sub>) δ -62.7. HRMS (ESI-TOF) *m/z* calcd for C<sub>13</sub>H<sub>11</sub>F<sub>3</sub>N<sub>2</sub>OS [M+H]<sup>+</sup> 300.0539, found 300.0533.

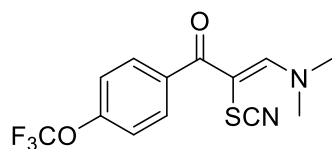

**(Z)-3-(dimethylamino)-2-thiocyanato-1-(4-(trifluoromethoxy)phenyl)prop-2-en-1-one (2i).**

Yellow oil. <sup>1</sup>H NMR (400 MHz, CDCl<sub>3</sub>) δ 7.60 (s, 1H), 7.48 (d, *J* = 8.5 Hz, 2H), 7.19 (d, *J* = 8.2 Hz, 2H), 3.33 (s, 6H). <sup>13</sup>C NMR (101 MHz, CDCl<sub>3</sub>) δ 191.5, 158.4, 150.5, 138.3, 129.9, 120.5, 113.2, 86.8. <sup>19</sup>F NMR (376 MHz, CDCl<sub>3</sub>) δ -57.7. HRMS (ESI-TOF) *m/z* calcd for C<sub>13</sub>H<sub>11</sub>F<sub>3</sub>N<sub>2</sub>O<sub>2</sub>S [M+H]<sup>+</sup> 316.0488, found 316.0484.

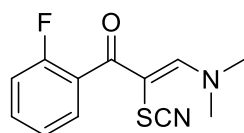

**(Z)-3-(dimethylamino)-1-(2-fluorophenyl)-2-thiocyanatoprop-2-en-1-one (2j).** Yellow solid, mp 145-146 °C. <sup>1</sup>H NMR (400 MHz, CDCl<sub>3</sub>) δ 7.60 (s, 1H), 7.54 – 7.37 (m, 2H), 7.04 (t, *J* = 8.5 Hz, 2H), 3.34 (s, 6H). <sup>13</sup>C NMR (101 MHz, CDCl<sub>3</sub>) δ 191.8, 165.2, 162.7, 158.3, 135.8, 130.5, 130.4, 115.5, 115.3, 113.4, 86.9. <sup>19</sup>F NMR (376 MHz, CDCl<sub>3</sub>) δ -109.1. HRMS (ESI-TOF) *m/z* calcd for C<sub>12</sub>H<sub>11</sub>FN<sub>2</sub>OS [M+H]<sup>+</sup> 250.0571, found 250.0574.

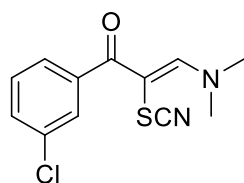

**(Z)-1-(3-chlorophenyl)-3-(dimethylamino)-2-thiocyanatoprop-2-en-1-one (2k).** Yellow solid, mp 113-114 °C. <sup>1</sup>H NMR (400 MHz, CDCl<sub>3</sub>) δ 7.56 (s, 1H), 7.43 – 7.32 (m, 2H), 7.29 (d, *J* = 4.9 Hz, 2H), 3.29 (s, 6H). <sup>13</sup>C NMR (101 MHz, CDCl<sub>3</sub>) δ 191.3, 158.5, 141.6, 134.4, 130.4, 129.7, 128.0, 126.1, 113.2, 87.0. HRMS (ESI-TOF) *m/z* calcd for C<sub>12</sub>H<sub>11</sub>ClN<sub>2</sub>OS [M+H]<sup>+</sup> 266.0275, found 266.0271.

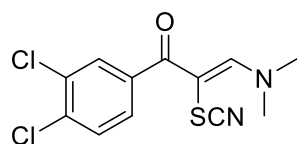

**(Z)-1-(3,4-dichlorophenyl)-3-(dimethylamino)-2-thiocyanatoprop-2-en-1-one (2l).** Yellow solid, mp 127-128 °C. <sup>1</sup>H NMR (400 MHz, CDCl<sub>3</sub>) δ 7.61 (s, 1H), 7.56 – 7.48 (m, 1H), 7.43 (d, *J* = 8.2 Hz, 1H), 7.27 (dd, *J* = 8.2, 1.6 Hz, 1H), 3.28 (s, 6H). <sup>13</sup>C NMR (101 MHz, CDCl<sub>3</sub>) δ 190.5, 158.3, 139.6, 134.7, 132.8, 130.4, 130.0, 127.2, 113.1, 86.5. HRMS (ESI-TOF) *m/z* calcd for C<sub>12</sub>H<sub>10</sub>Cl<sub>2</sub>N<sub>2</sub>OS [M+H]<sup>+</sup> 299.9885, found 299.9880.

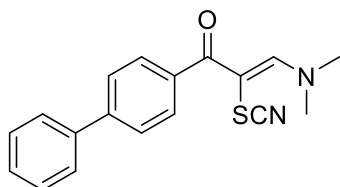

**(Z)-1-([1,1'-biphenyl]-4-yl)-3-(dimethylamino)-2-thiocyanatoprop-2-en-1-one (2m).** Yellow solid, mp 142-144 °C. <sup>1</sup>H NMR (400 MHz, CDCl<sub>3</sub>) δ 7.71 (s, 1H), 7.69 – 7.54 (m, 6H), 7.46 (t, *J* = 7.5 Hz, 2H), 7.38 (t, *J* = 7.3 Hz, 1H), 3.38 (s, 6H). <sup>13</sup>C NMR (101 MHz, CDCl<sub>3</sub>) δ 192.6, 158.6, 143.3, 140.1, 138.5, 129.0, 128.8, 128.0, 127.2, 127.0, 113.5, 87.3. HRMS (ESI-TOF) *m/z* calcd for C<sub>18</sub>H<sub>16</sub>N<sub>2</sub>OS [M+H]<sup>+</sup> 308.0978, found 308.0985.

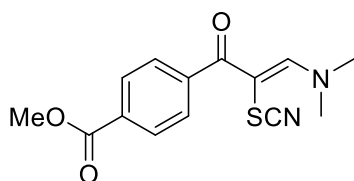

**methyl (Z)-4-(3-(dimethylamino)-2-thiocyanatoacryloyl)benzoate (2n).** Yellow solid, mp 125-126 °C. <sup>1</sup>H NMR (400 MHz, CDCl<sub>3</sub>) δ 8.10 (d, *J* = 8.1 Hz, 2H), 7.68 (s, 1H), 7.55 (d, *J* = 8.0 Hz, 2H), 3.95 (s, 3H), 3.41 (brs, 6H). <sup>13</sup>C NMR (101 MHz, CDCl<sub>3</sub>) δ 192.3, 166.5, 158.3, 144.2, 131.5, 129.6, 127.8, 113.1, 87.1, 52.4. HRMS (ESI-TOF) *m/z* calcd for C<sub>14</sub>H<sub>14</sub>N<sub>2</sub>O<sub>3</sub>S [M+H]<sup>+</sup> 290.0720, found 290.0713.

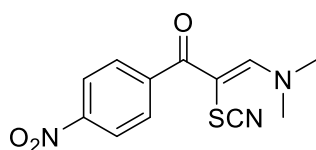

**(Z)-3-(dimethylamino)-1-(4-nitrophenyl)-2-thiocyanatoprop-2-en-1-one (2o).** Yellow solid, mp 127-128 °C. <sup>1</sup>H NMR (400 MHz, CDCl<sub>3</sub>) δ 8.29 (d, *J* = 8.7 Hz, 2H), 7.77 (s, 1H), 7.66 (d, *J* = 8.6 Hz, 2H), 3.62 (s, 3H), 3.30 (s, 3H). <sup>13</sup>C NMR (101 MHz, CDCl<sub>3</sub>) δ 191.3, 158.3, 148.5, 146.2, 128.6, 123.7, 113.0, 86.2. HRMS (ESI-TOF) *m/z* calcd for C<sub>12</sub>H<sub>11</sub>N<sub>3</sub>O<sub>3</sub>S [M+H]<sup>+</sup> 277.0516, found 277.0510.

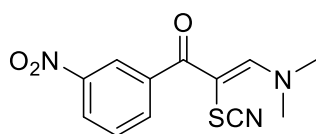

**(Z)-3-(dimethylamino)-1-(3-nitrophenyl)-2-thiocyanatoprop-2-en-1-one (2p).** Yellow solid, mp 134-135 °C. <sup>1</sup>H NMR (400 MHz, CDCl<sub>3</sub>) δ 8.33 (d, *J* = 8.8 Hz, 2H), 7.88 (d, *J* = 7.5 Hz, 1H), 7.80 (s, 1H), 7.65 (t, *J* = 7.8 Hz, 1H), 3.47 (d, *J* = 97.3 Hz, 6H). <sup>13</sup>C NMR (101 MHz, CDCl<sub>3</sub>) δ 190.7, 158.2, 147.8, 141.5, 133.7, 129.6, 125.0, 122.9, 112.9, 85.9. HRMS (ESI-TOF) *m/z* calcd for C<sub>12</sub>H<sub>11</sub>N<sub>3</sub>O<sub>3</sub>S [M+H]<sup>+</sup> 277.0516, found 277.0510.

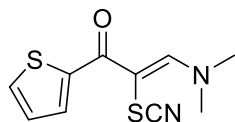

**(Z)-3-(dimethylamino)-2-thiocyanato-1-(thiophen-2-yl)prop-2-en-1-one (2q).** Yellow solid, mp 130-132 °C. <sup>1</sup>H NMR (400 MHz, CDCl<sub>3</sub>) δ 7.89 (s, 1H), 7.61 – 7.42 (m, 2H), 7.02 (s, 1H), 3.35 (s, 6H). <sup>13</sup>C NMR (101 MHz, CDCl<sub>3</sub>) δ 181.9, 157.1, 141.9, 130.7, 130.5, 126.2, 112.3, 84.4. HRMS (ESI-TOF) *m/z* calcd for C<sub>10</sub>H<sub>10</sub>N<sub>2</sub>OS<sub>2</sub> [M+H]<sup>+</sup> 238.0229, found 238.0221.

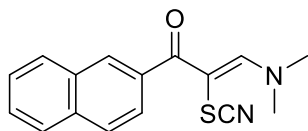

**(Z)-3-(dimethylamino)-1-(naphthalen-2-yl)-2-thiocyanatoprop-2-en-1-one (2r).** Yellow solid, mp 117-119 °C. <sup>1</sup>H NMR (400 MHz, CDCl<sub>3</sub>) δ 7.86 – 7.71 (m, 3H), 7.51 (s, 1H), 7.45 – 7.37 (m, 3H), 7.31 (d, *J* = 6.9 Hz, 1H), 3.45 (s, 3H), 2.98 (s, 3H). <sup>13</sup>C NMR (101 MHz, CDCl<sub>3</sub>) δ 193.4, 158.5, 138.0, 133.5, 130.4, 129.5, 128.3, 127.0, 126.5, 125.2, 124.8, 124.5, 113.3, 85.7. HRMS (ESI-TOF) *m/z* calcd for C<sub>16</sub>H<sub>14</sub>N<sub>2</sub>OS [M+H]<sup>+</sup> 282.0821, found 282.0815.

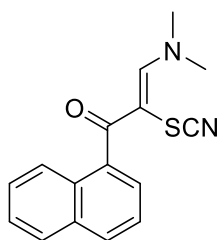

**(Z)-3-(dimethylamino)-1-(naphthalen-1-yl)-2-thiocyanatoprop-2-en-1-one (2s).** Yellow solid, mp 123-124 °C. <sup>1</sup>H NMR (400 MHz, CDCl<sub>3</sub>) δ 7.88 (s, 1H), 7.79 (dt, *J* = 8.6, 4.3 Hz, 3H), 7.58 (s, 1H), 7.55 – 7.40 (m, 3H), 3.24 (s, 6H). <sup>13</sup>C NMR (101 MHz, CDCl<sub>3</sub>) δ 191.7, 157.6, 136.1, 133.0, 131.3, 127.7, 127.2, 127.1, 126.7, 126.4, 125.7, 124.1, 112.4, 86.4. HRMS (ESI-TOF) *m/z* calcd for C<sub>16</sub>H<sub>14</sub>N<sub>2</sub>OS [M+H]<sup>+</sup> 282.0821, found 282.0815.

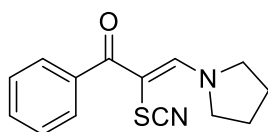

**(Z)-1-phenyl-3-(pyrrolidin-1-yl)-2-thiocyanatoprop-2-en-1-one (2v).**<sup>1</sup> Yellow solid. <sup>1</sup>H NMR (400 MHz, CDCl<sub>3</sub>) δ 7.83 (s, 1H), 7.84 – 7.40 (m, 5H), 4.09 (brs, 1H), 3.57 (brs, 1H), 2.07 (brs,

1H), 1.89 (brs, 1H). <sup>13</sup>C NMR (101 MHz, CDCl<sub>3</sub>) δ 192.3, 155.1, 139.8, 130.2, 128.0, 127.9, 113.5, 87.6.

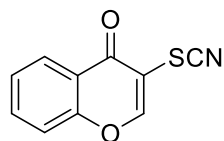

**3-thiocyanato-4H-chromen-4-one (3a).**<sup>2</sup> White solid. <sup>1</sup>H NMR (400 MHz, CDCl<sub>3</sub>) δ 8.28 (s, 1H), 8.18 (dd, *J* = 8.0, 1.7 Hz, 1H), 7.72 (m, 1H), 7.50 – 7.43 (m, 2H). <sup>13</sup>C NMR (101 MHz, CDCl<sub>3</sub>) δ 173.1, 156.3, 155.6, 135.1, 126.7, 126.1, 122.6, 118.5, 112.4, 109.1.

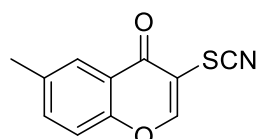

**6-methyl-3-thiocyanato-4H-chromen-4-one (3b).**<sup>2</sup> White solid. <sup>1</sup>H NMR (400 MHz, CDCl<sub>3</sub>) δ 8.31 (s, 1H), 7.98 (s, 1H), 7.59 (d, *J* = 8.6, 1H), 7.45 (d, *J* = 8.4, 1H), 2.47 (s, 3H). <sup>13</sup>C NMR (101 MHz, CDCl<sub>3</sub>) δ 173.3, 155.7, 154.8, 137.1, 136.3, 125.8, 122.6, 118.3, 112.3, 109.3, 20.9.

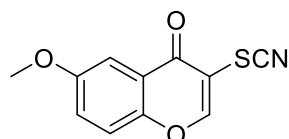

**6-methoxy-3-thiocyanato-4H-chromen-4-one (3c).**<sup>2</sup> White solid. <sup>1</sup>H NMR (400 MHz, CDCl<sub>3</sub>) δ 8.35 (s, 1H), 7.60 (s, 1H), 7.51 (d, *J* = 8.7, 1H), 7.39 (d, *J* = 8.9, 1H), 3.95 (s, 3H). <sup>13</sup>C NMR (101 MHz, CDCl<sub>3</sub>) δ 173.1, 157.9, 155.5, 151.5, 125.1, 123.5, 119.9, 111.6, 109.1, 105.1, 56.0.

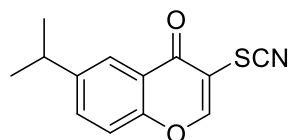

**6-isopropyl-3-thiocyanato-4H-chromen-4-one (3d).** Yellow oil. <sup>1</sup>H NMR (400 MHz, CDCl<sub>3</sub>) δ 8.35 (s, 1H), 8.06 (d, *J* = 2.3 Hz, 1H), 7.66 (dd, *J* = 8.7, 2.3 Hz, 1H), 7.48 (d, *J* = 8.7 Hz, 1H), 3.06 (p, *J* = 6.9 Hz, 1H), 1.31 (s, 3H), 1.30 (s, 3H). <sup>13</sup>C NMR (101 MHz, CDCl<sub>3</sub>) δ 173.2, 155.8, 154.8, 147.8, 134.0, 122.7, 122.5, 118.3, 111.9, 109.1, 33.8, 23.8. HRMS (ESI-TOF) *m/z* calcd for C<sub>13</sub>H<sub>11</sub>NO<sub>2</sub>S [M+H]<sup>+</sup> 245.0505, found 245.0512.

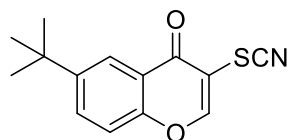

**6-(tert-butyl)-3-thiocyanato-4H-chromen-4-one (3e).** White solid, mp 123-125 °C. <sup>1</sup>H NMR (400 MHz, CDCl<sub>3</sub>) δ 8.26 (s, 1H), 8.14 (d, *J* = 2.4 Hz, 1H), 7.76 (dd, *J* = 8.9, 2.5 Hz, 1H), 7.41 (d, *J* = 8.9 Hz, 1H), 1.31 (s, 9H). <sup>13</sup>C NMR (101 MHz, CDCl<sub>3</sub>) δ 173.4, 155.4, 154.6, 150.2, 133.1, 122.1, 121.8, 118.0, 112.2, 109.2, 35.1, 31.3. HRMS (ESI-TOF) *m/z* calcd for C<sub>14</sub>H<sub>13</sub>NO<sub>2</sub>S [M+H]<sup>+</sup> 259.0662, found 259.0668.

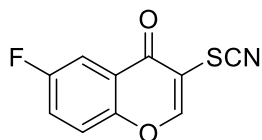

**6-fluoro-3-thiocyanato-4H-chromen-4-one (3f).**<sup>2</sup> White solid. <sup>1</sup>H NMR (400 MHz, CDCl<sub>3</sub>) δ 8.36 (s, 1H), 7.88 (m, 1H), 7.59 (m, 1H), 7.51 (m, 1H). <sup>13</sup>C NMR (101 MHz, CDCl<sub>3</sub>) δ 172.37, 172.35, 161.41, 158.93, 155.67, 155.65, 152.61, 152.60, 124.38, 123.92, 123.84, 123.52, 123.48, 123.27, 120.81, 120.73, 112.12, 111.20, 110.96, 108.68. <sup>19</sup>F NMR (376 MHz, CDCl<sub>3</sub>) δ -112.1.

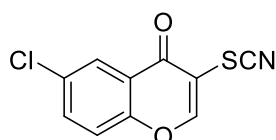

**6-chloro-3-thiocyanato-4H-chromen-4-one (3g).**<sup>2</sup> White solid. <sup>1</sup>H NMR (400 MHz, CDCl<sub>3</sub>) δ 8.34 (s, 1H), 8.19 (d, *J* = 4.8 Hz, 1H), 7.75 – 7.72 (m, 1H), 7.53 (d, *J* = 7.2 Hz, 1H); <sup>13</sup>C NMR (101 MHz, CDCl<sub>3</sub>) δ 172.1, 155.6, 154.8, 135.4, 132.8, 125.6, 123.6, 120.2, 113.0, 108.8.

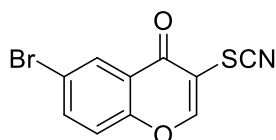

**6-bromo-3-thiocyanato-4H-chromen-4-one (3h).**<sup>2</sup> White solid. <sup>1</sup>H NMR (400 MHz, CDCl<sub>3</sub>) δ 8.42 – 8.29 (m, 2H), 7.86 (dd, *J* = 9.0, 2.4 Hz, 1H), 7.45 (d, *J* = 8.9 Hz, 1H). <sup>13</sup>C NMR (101 MHz, CDCl<sub>3</sub>) δ 171.8, 155.3, 155.1, 138.1, 128.7, 123.8, 120.3, 120.2, 113.0, 108.6.

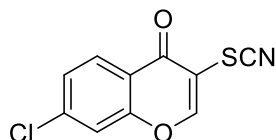

**7-chloro-3-thiocyanato-4H-chromen-4-one (3i).**<sup>2</sup> White solid. <sup>1</sup>H NMR (400 MHz, CDCl<sub>3</sub>) δ 8.32 (s, 1H), 8.19 (d, *J* = 8.6 Hz, 1H), 7.57 (s, 1H), 7.49 (d, *J* = 8.4 Hz, 1H). <sup>13</sup>C NMR (101 MHz, CDCl<sub>3</sub>) δ 172.3, 156.4, 155.2, 141.4, 127.6, 127.5, 121.1, 118.5, 113.3, 108.6.

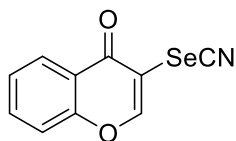

**3-selenocyanato-4H-chromen-4-one (3j).**<sup>2</sup> White solid, mp 160-162 °C. <sup>1</sup>H NMR (400 MHz, CDCl<sub>3</sub>) δ 8.27 (s, 1H), 8.19 (dd, *J* = 8.0, 1.6 Hz, 1H), 7.79 (ddd, *J* = 8.7, 7.2, 1.6 Hz, 1H), 7.56 (d, *J* = 8.6 Hz, 1H), 7.51 (t, *J* = 7.6 Hz, 1H). <sup>13</sup>C NMR (101 MHz, CDCl<sub>3</sub>) δ 174.2, 156.6, 153.2, 135.0, 126.5, 125.8, 121.9, 118.5, 112.6, 100.0. HRMS (ESI-TOF) *m/z* calcd for C<sub>10</sub>H<sub>5</sub>NO<sub>2</sub>Se [M+H]<sup>+</sup> 250.9480, found 250.9491.

#### Reference

1. Y. Gao, Y. Liu, J.-P. Wan, J. Org. Chem., 2019, 84, 2243
2. X.-Z. Zhang, D.-L. Ge, S.-Y. Chen, X.-Q. Yu, RSC Adv., 2016, 6, 66320





Yz-2018121704.1.fid

7.658  
7.506  
7.489  
7.486  
7.467  
7.450  
7.436  
7.418  
7.401

3.386

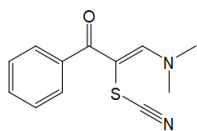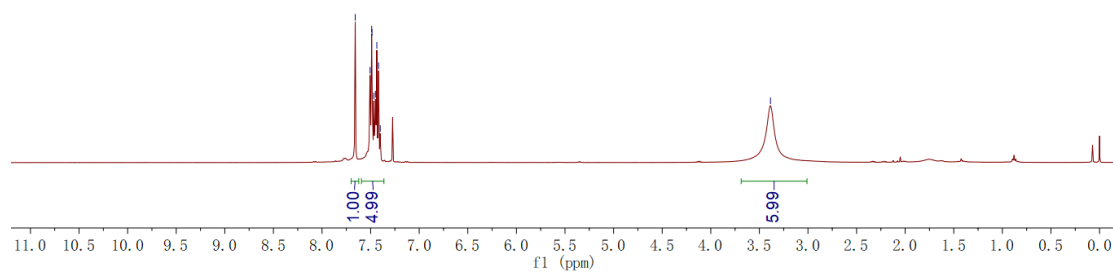

Yz-2018121704.2.fid

192.922

158.490

139.804

130.469

128.331

128.079

113.434

87.399

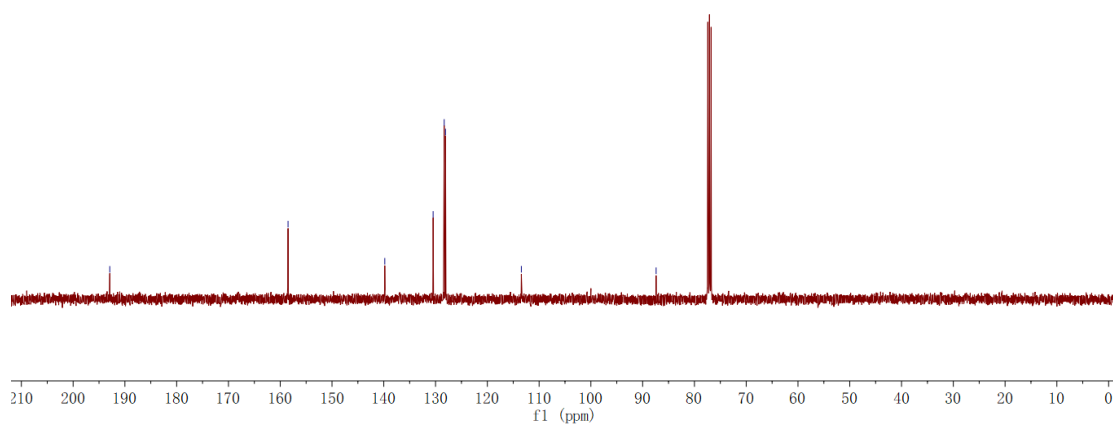

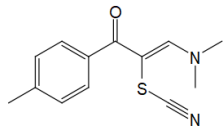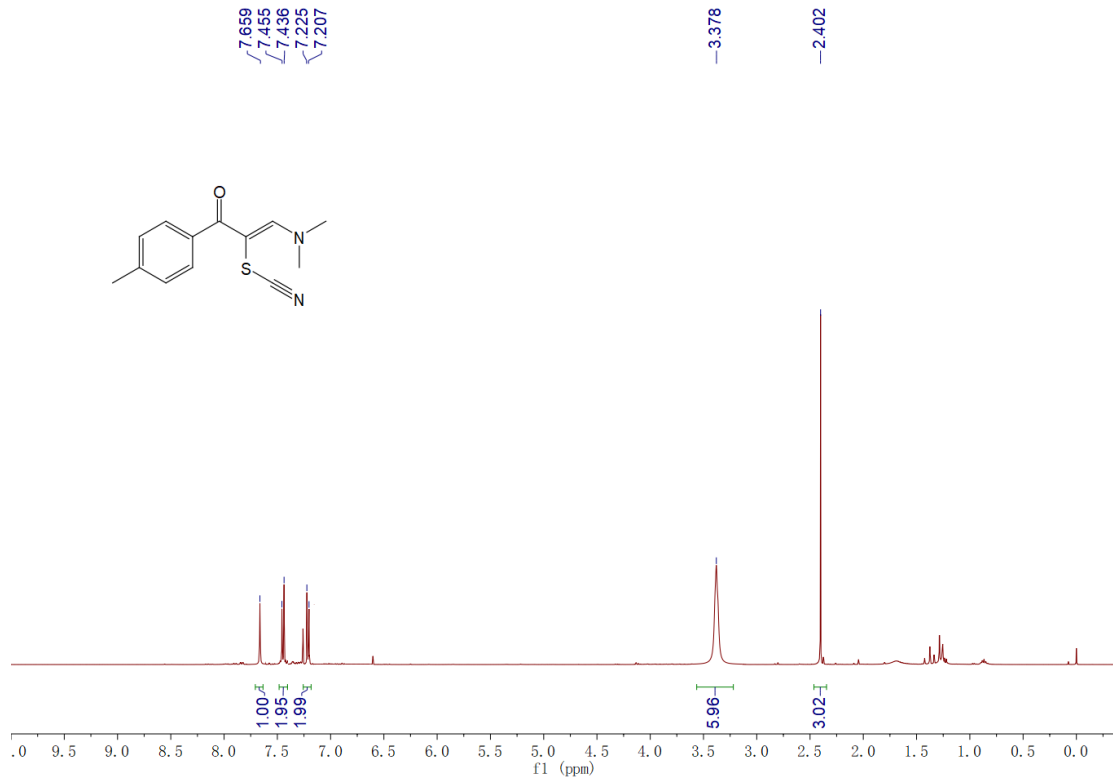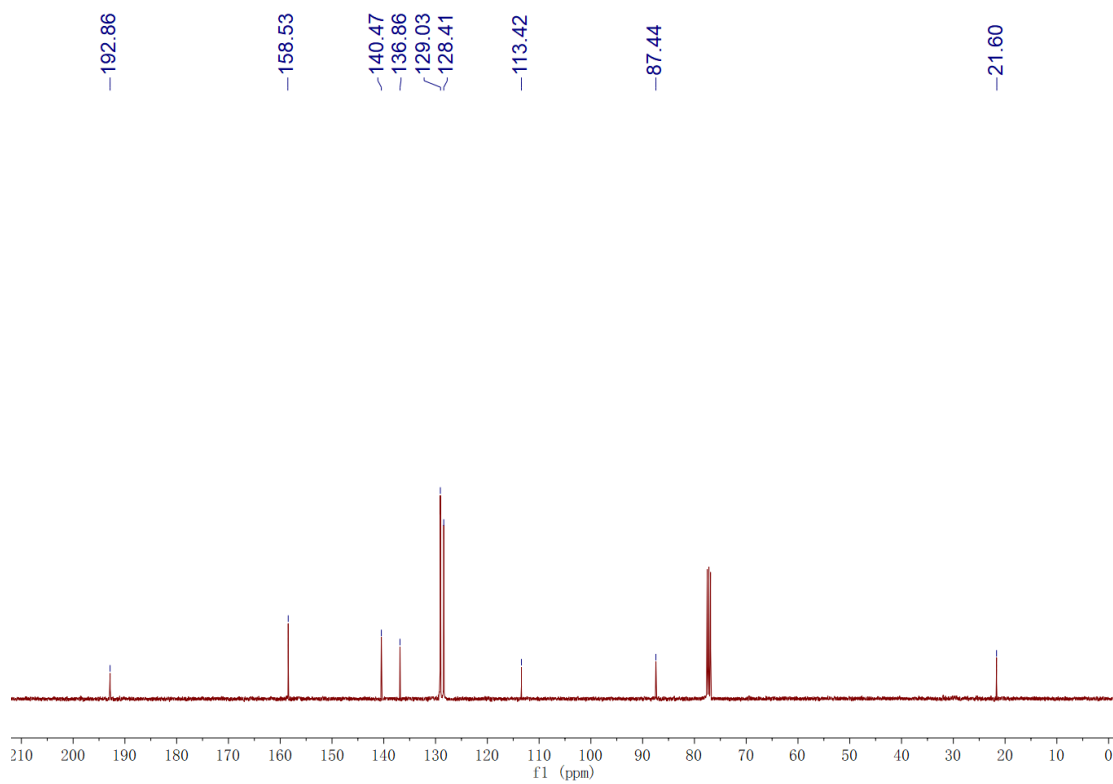

Yz-201901103.1.fid

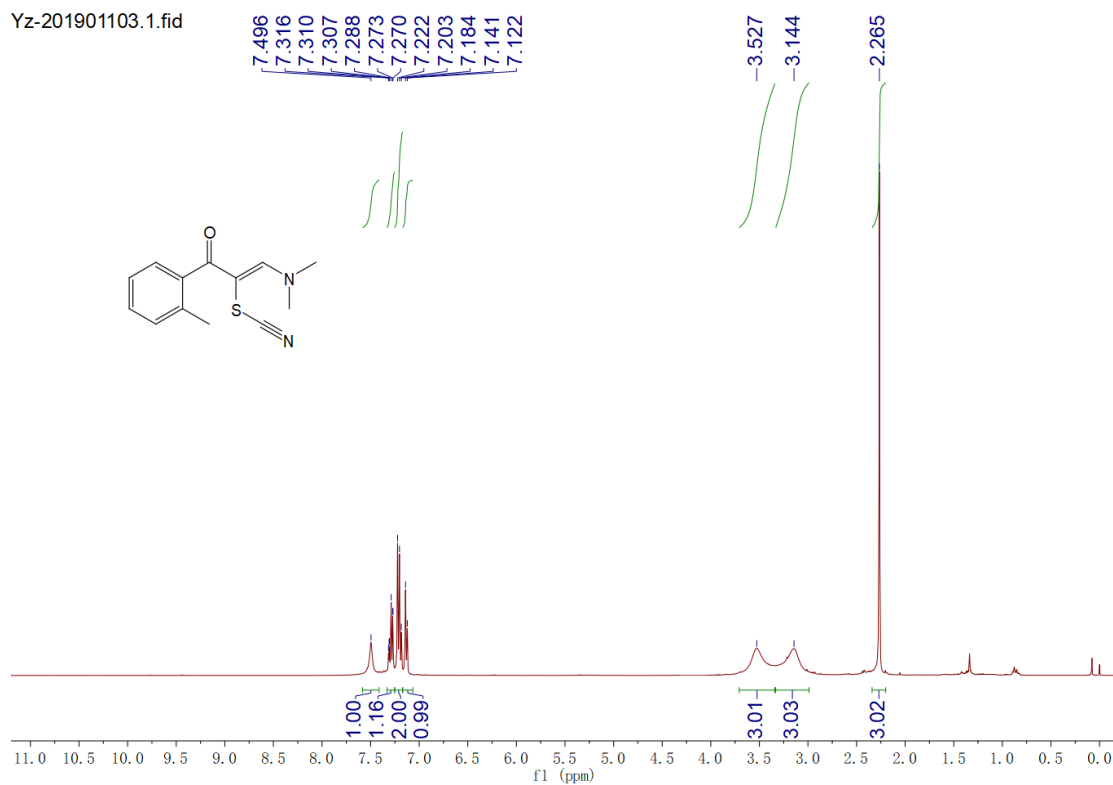

Yz-201901103.2.fid

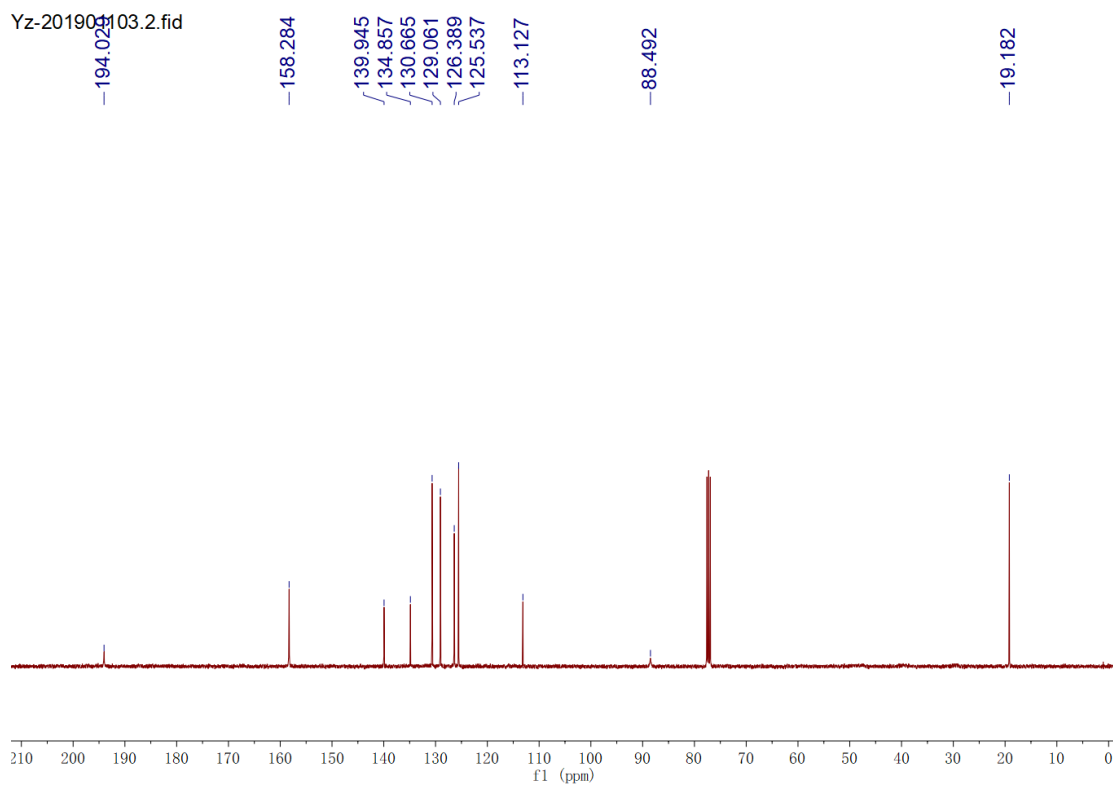

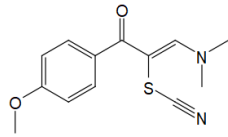

7.667  
7.538  
7.516  
6.935  
6.913  
-3.857  
-3.389

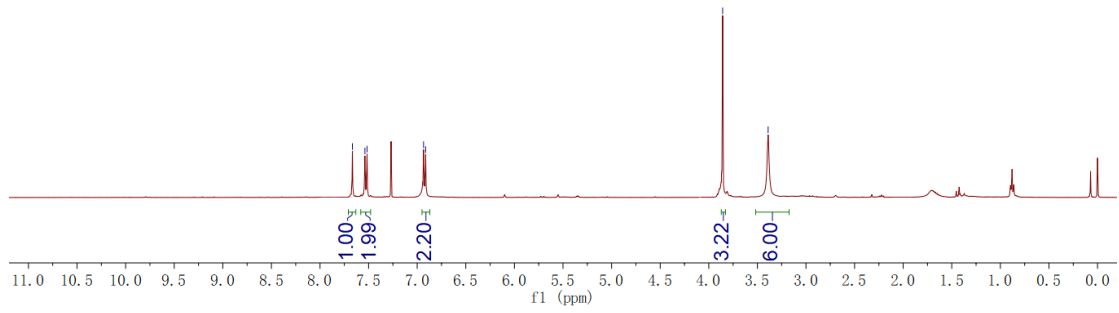

Yz-2019020302.2.fid

192.108  
161.620  
158.172  
131.870  
130.791  
130.508  
113.532  
87.065  
55.434

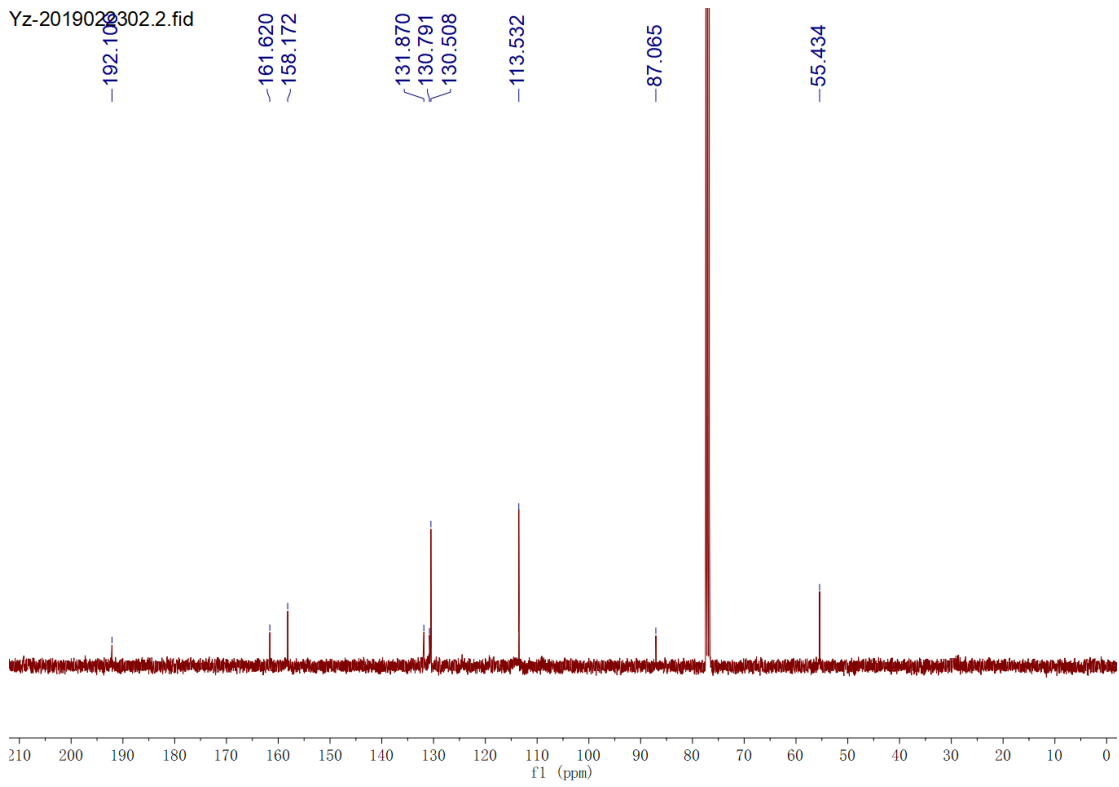

Yz-2019022305.1.fid

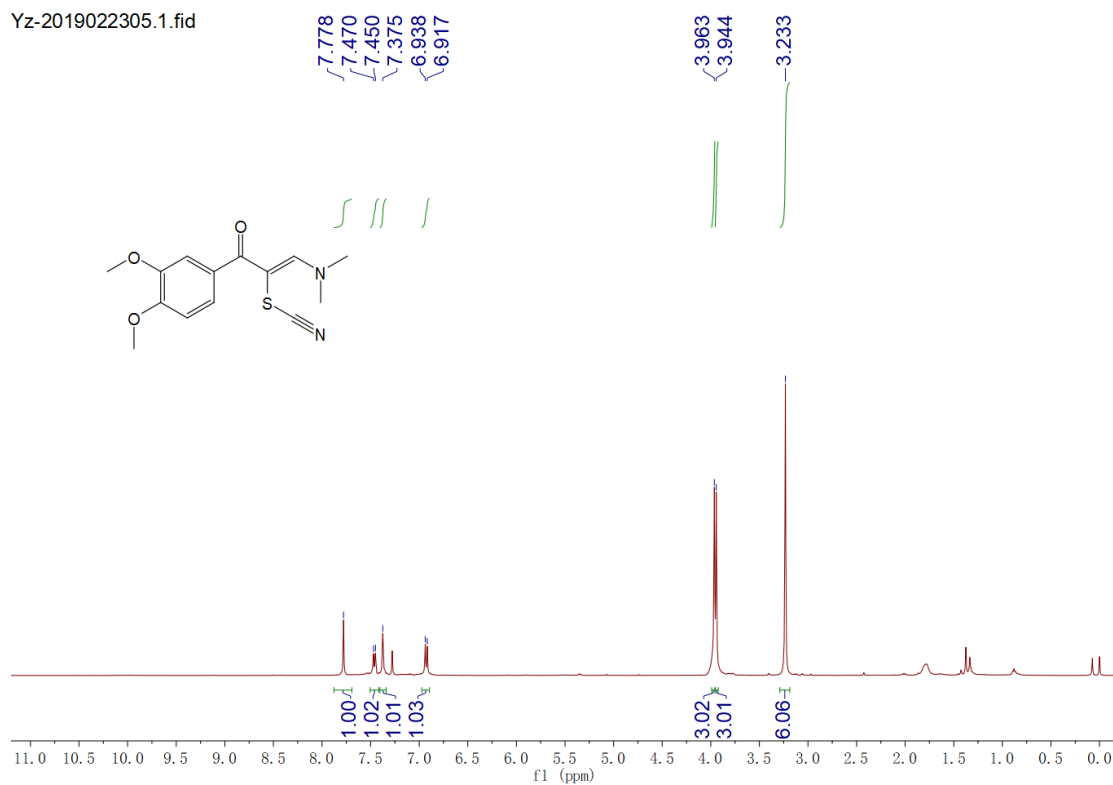

Yz-2019022305.2.fid

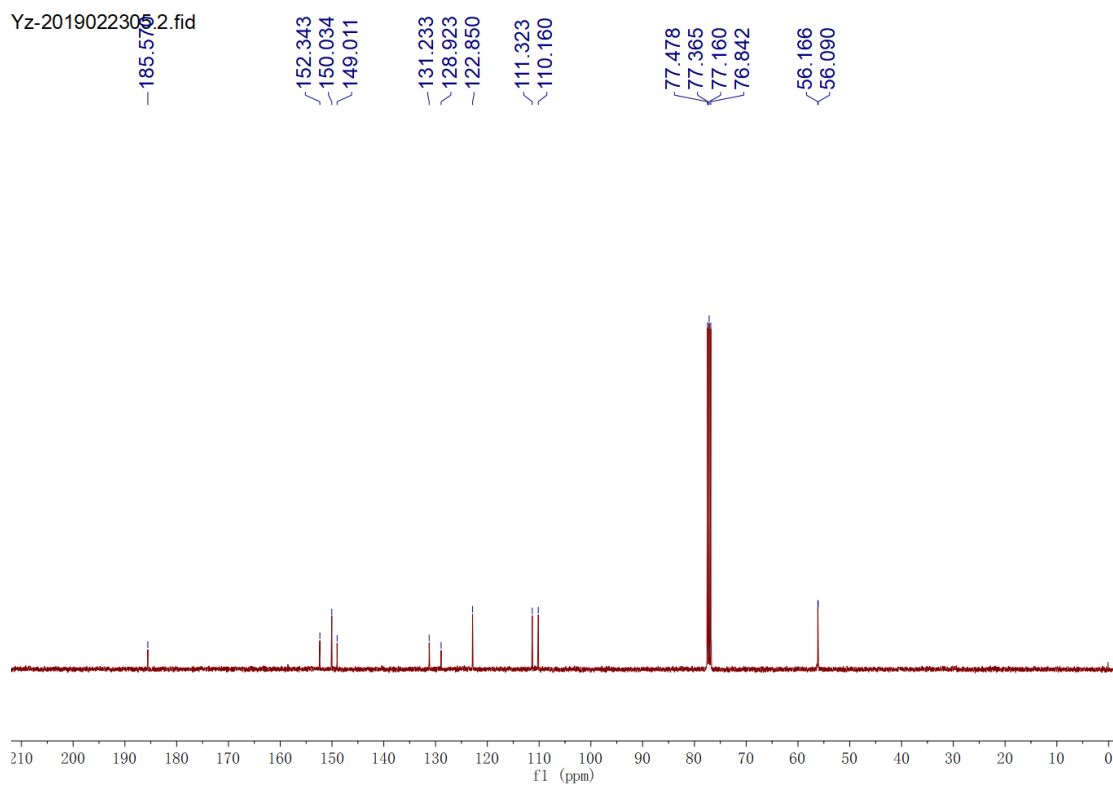

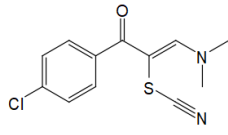

7.643  
7.467  
7.446  
7.415  
7.393

-3.397

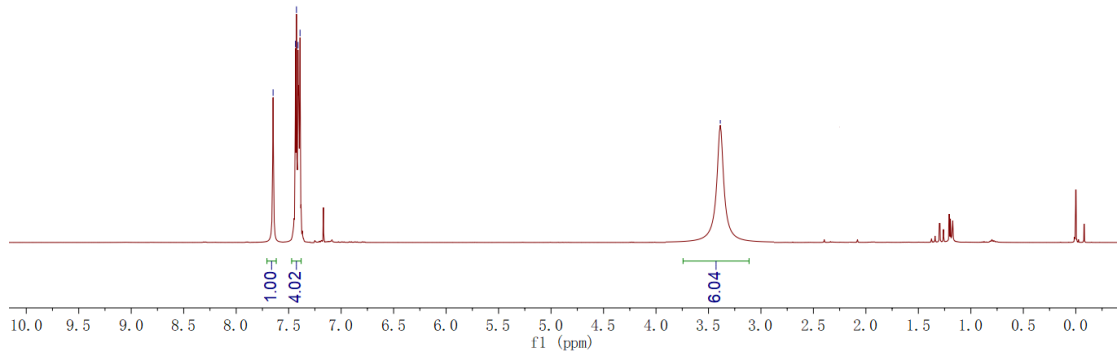

-191.253

-158.220

138.052

136.243

129.486

128.413

-113.063

-86.845

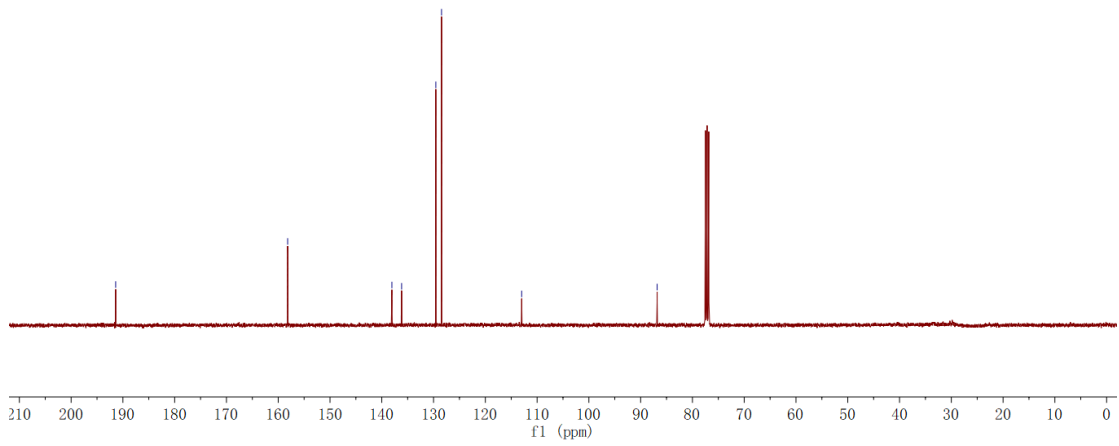

Yz-2018121803.1.fid  
duixiu

7.592  
7.500  
7.479  
7.324  
7.303

3.336

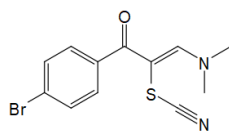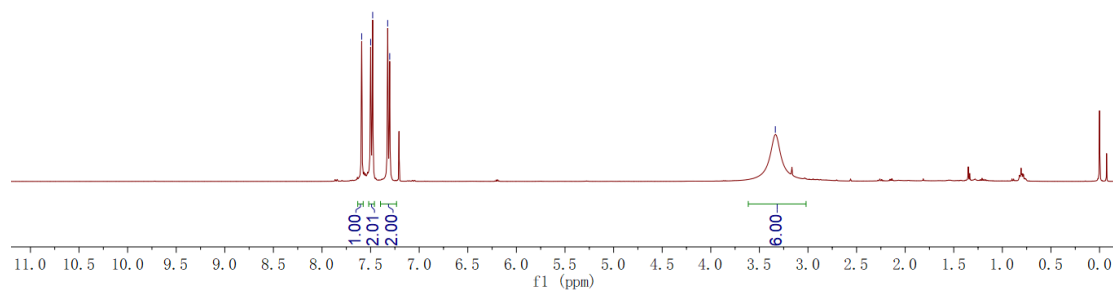

Yz-2018121803.2.fid  
duixiu

191.873  
158.300  
138.607  
131.525  
129.702  
124.916  
113.232  
86.890

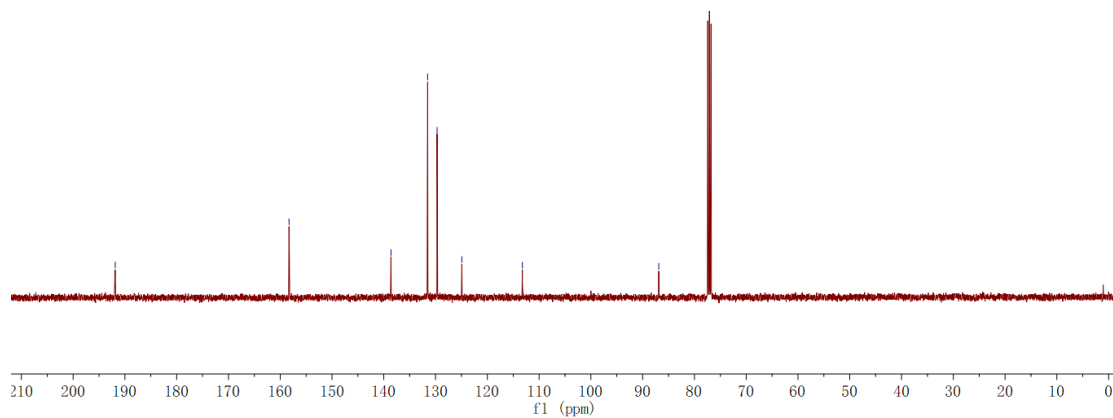



Yz-2019010902.1.fid

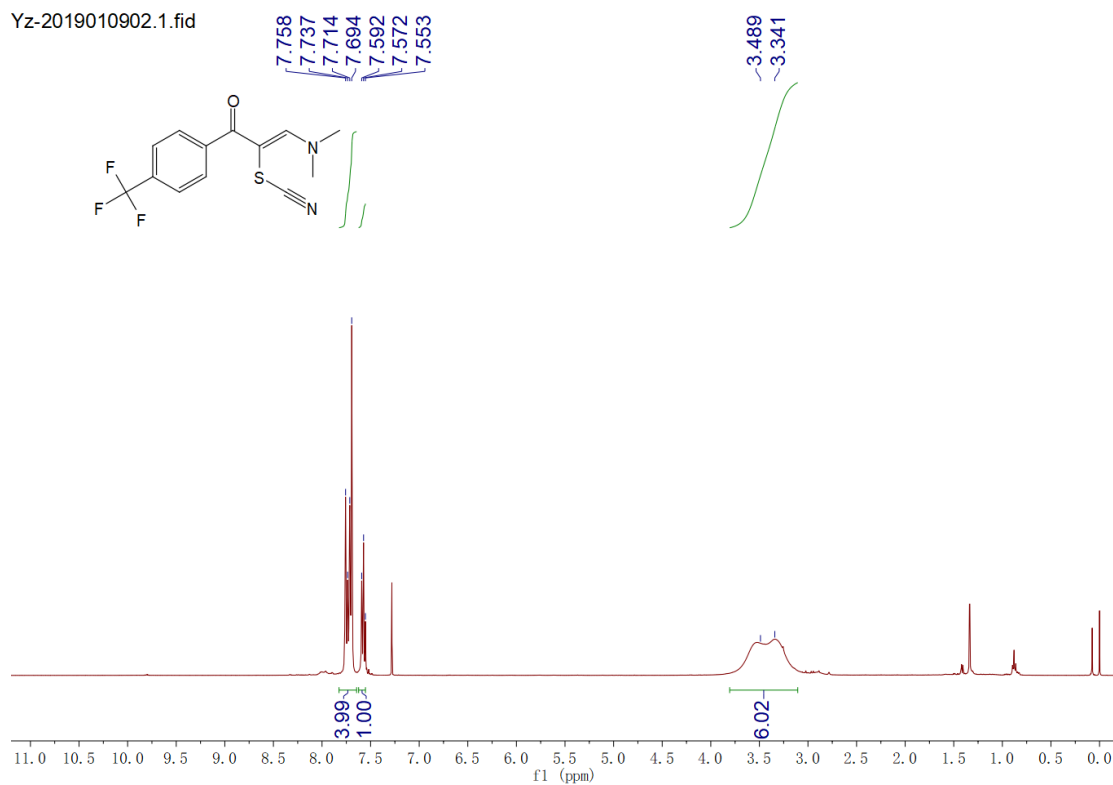

Yz-2019010902.2.fid

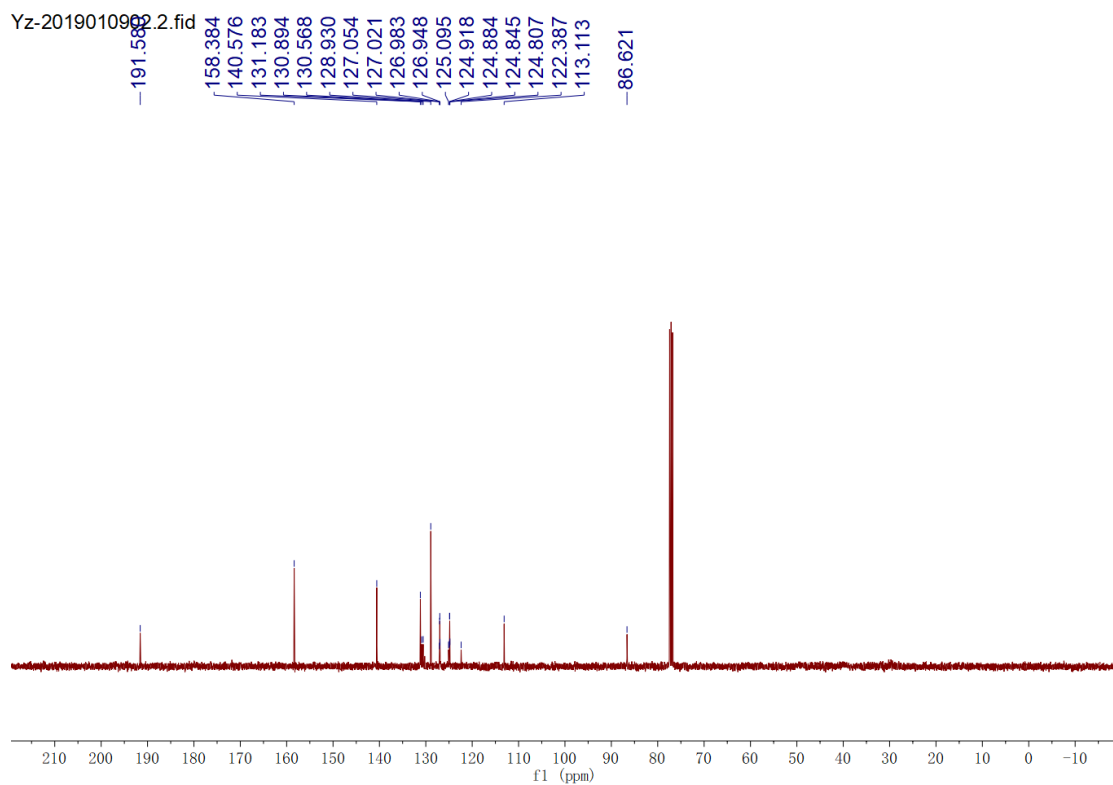

Yz-2019010603.1.fid

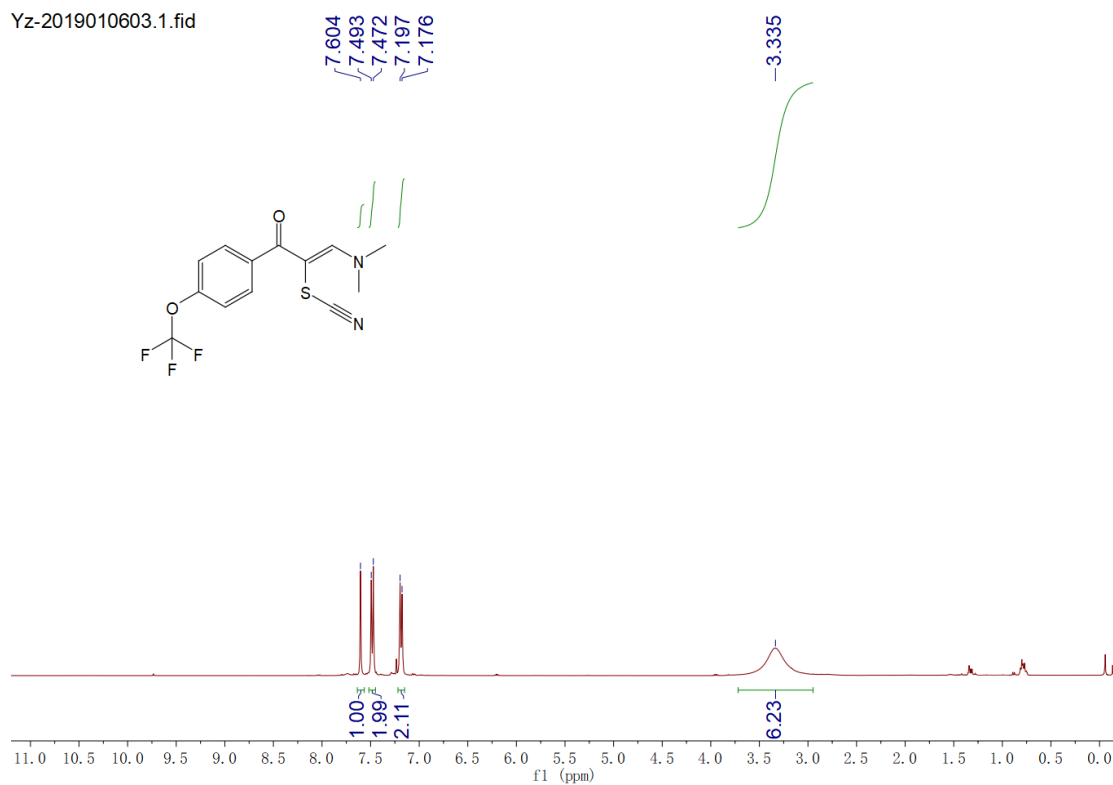

Yz-2019010603.2.fid

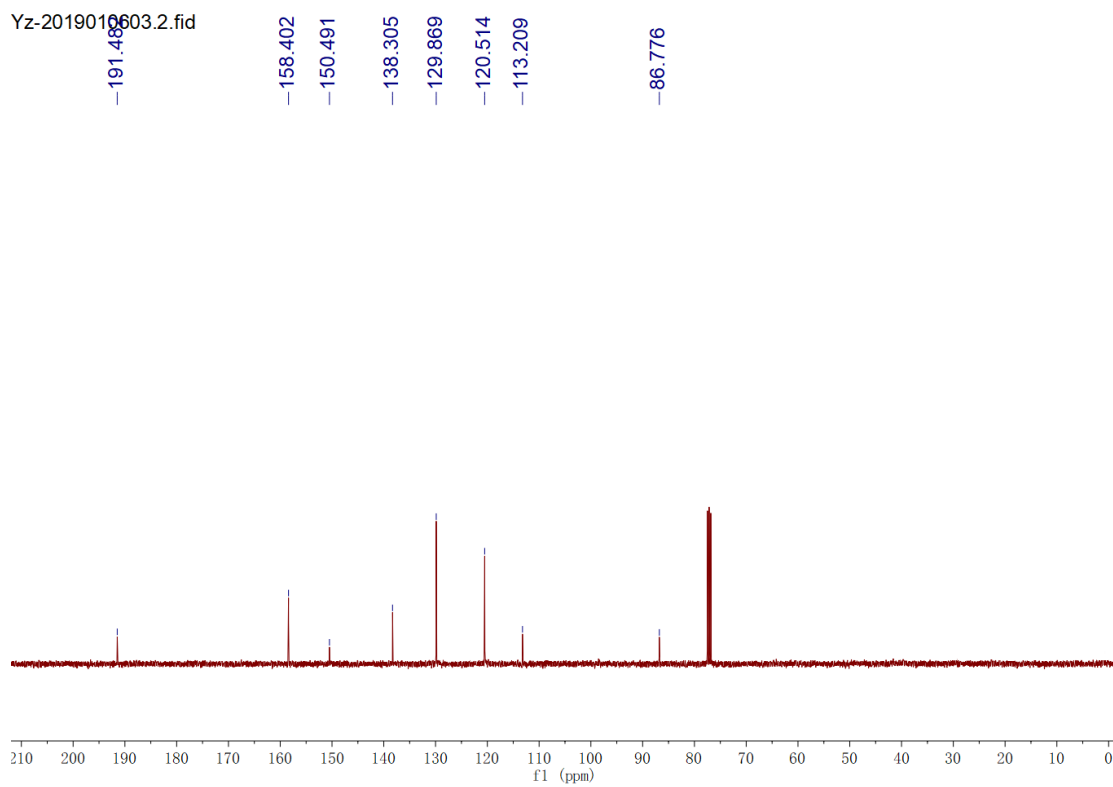

Yz-2018010602.1.fid

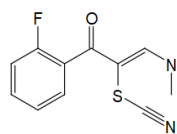

7.602  
7.482  
7.469  
7.461  
7.061  
7.040  
7.019

3.338

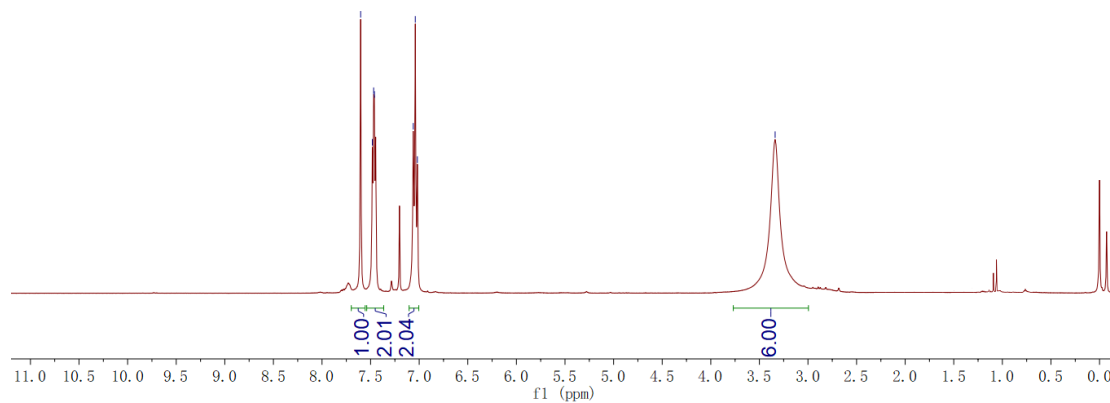

Yz-2018010602.2.fid

191.799

165.222

162.729

158.293

135.803

130.515

130.428

115.521

115.305

113.371

86.875

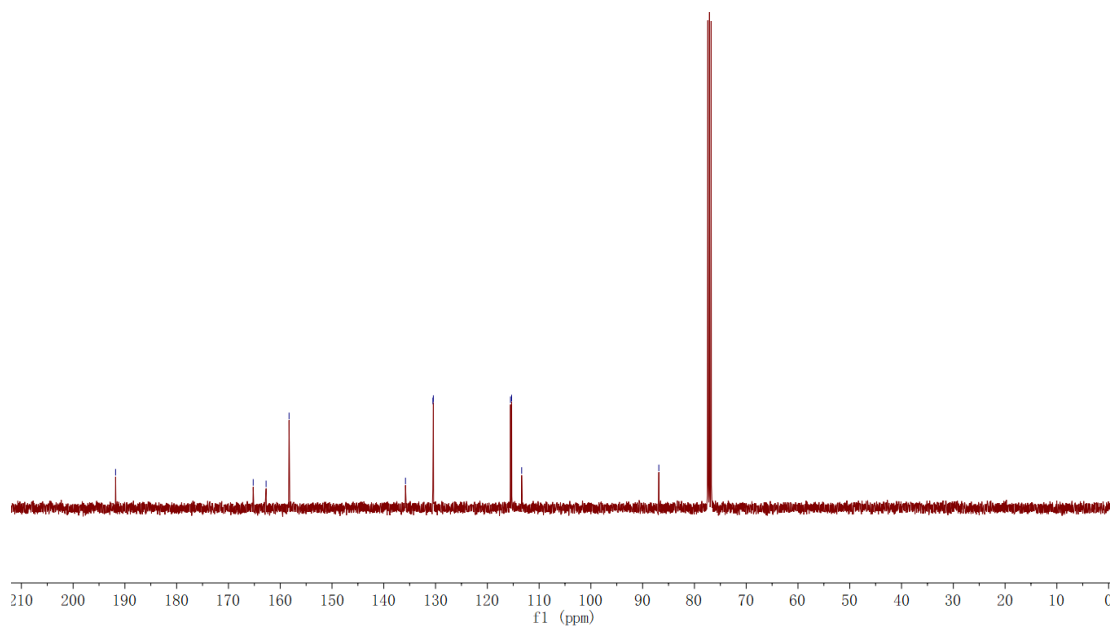

Yz-2019010601.1.fid

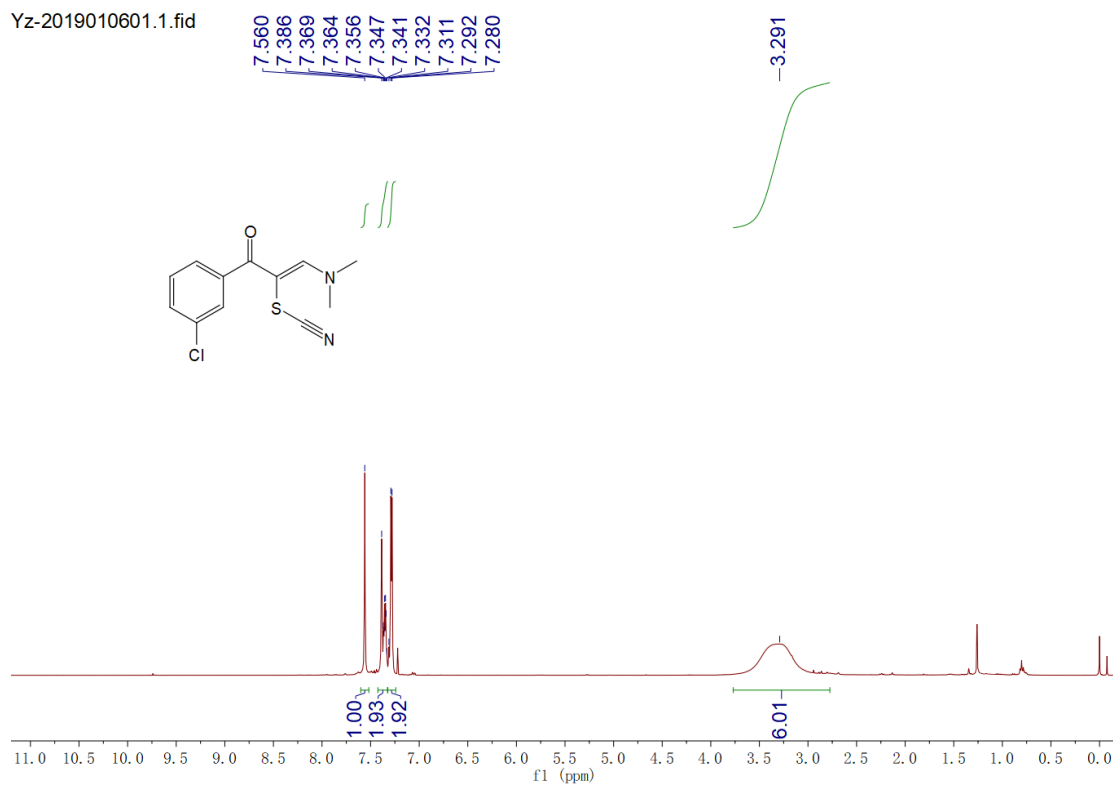

Yz-2019010601.2.fid

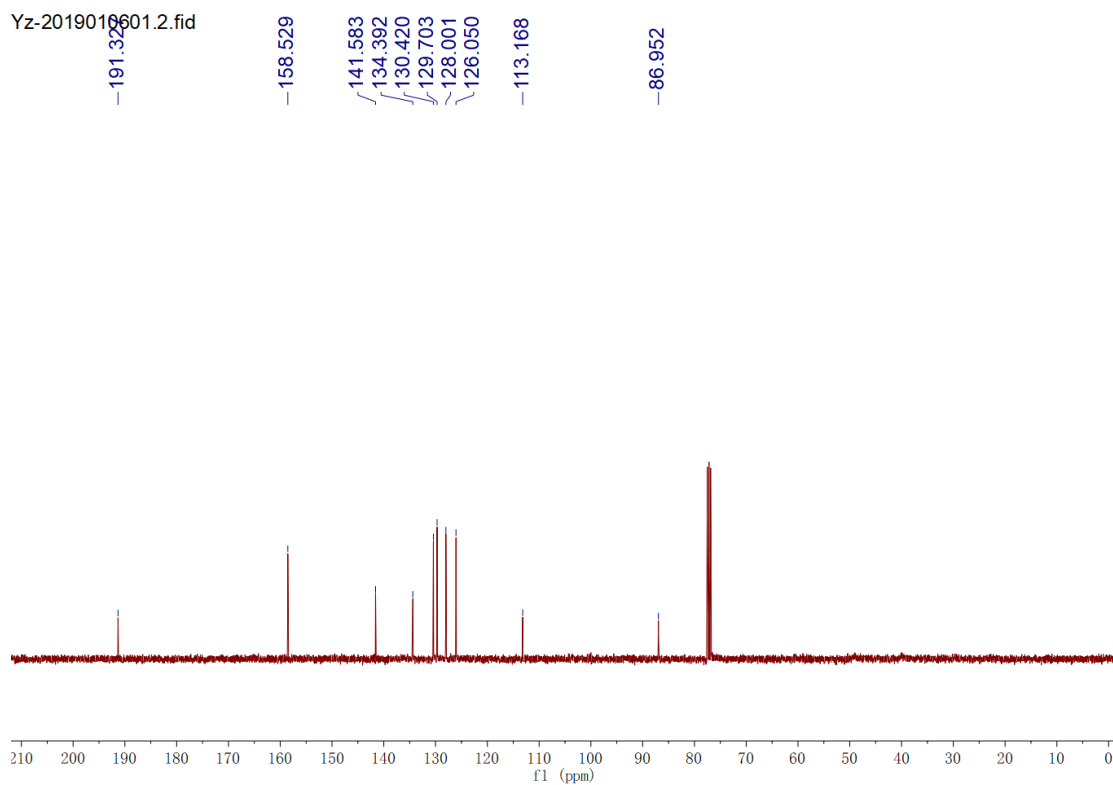

Yz-2019011202.1.fid

7.607  
7.522  
7.518  
7.443  
7.422  
7.285  
7.281  
7.264  
7.261

-3.281

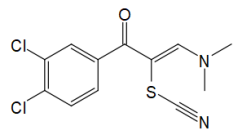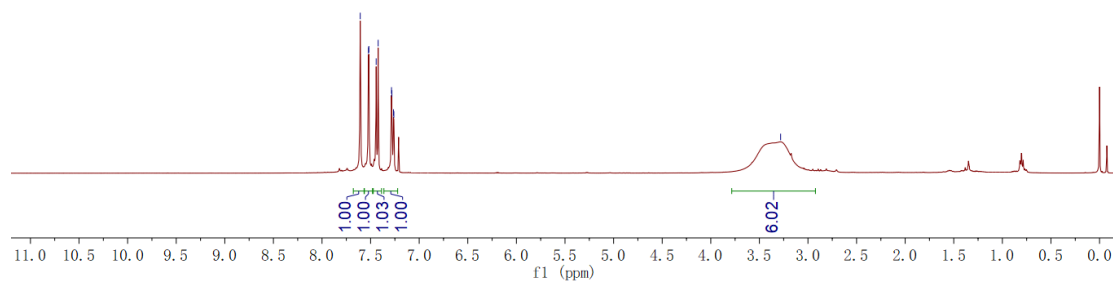

Yz-2019011202.1.fid  
erlu

-190.483

-158.333

-139.610

-134.649

-132.753

-130.370

-129.990

-127.230

-113.064

-86.477

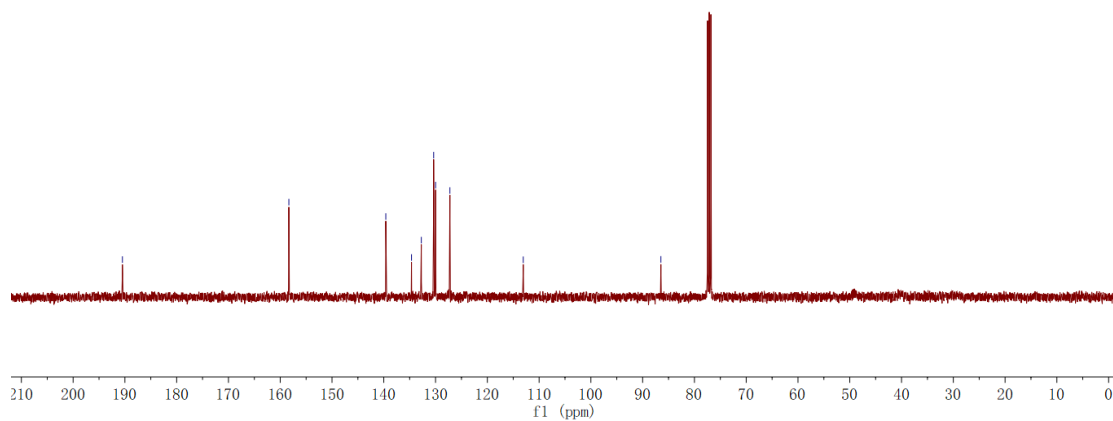

Yz-2019010903.1.fid

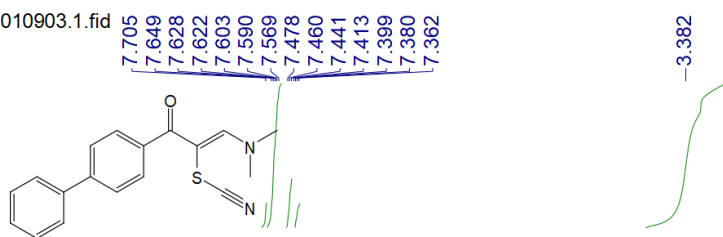

7.705  
7.649  
7.628  
7.622  
7.603  
7.590  
7.569  
7.478  
7.460  
7.441  
7.413  
7.399  
7.380  
7.362

-3.382

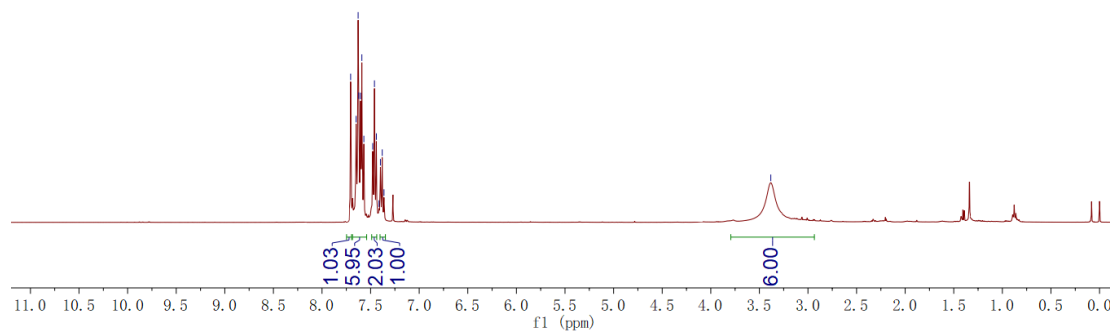

Yz-2019010903.2.fid

192.568  
158.546  
143.290  
140.066  
138.497  
128.970  
128.828  
127.967  
127.187  
127.000  
113.510  
87.315

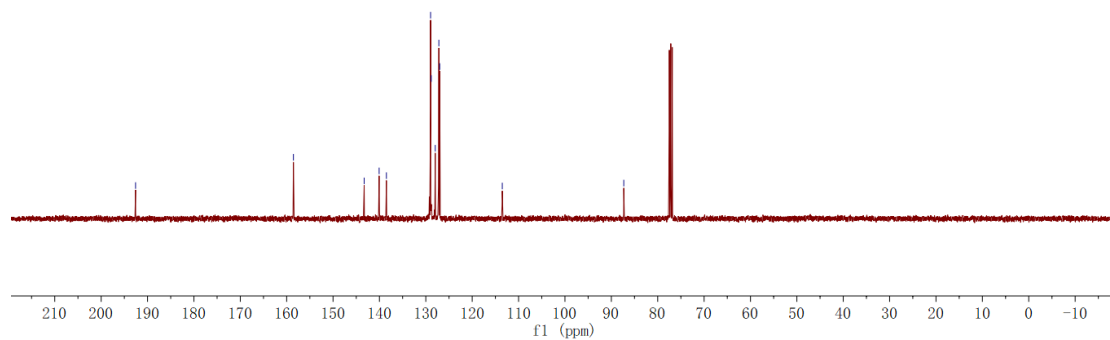

Yz-2018122204.1.fid

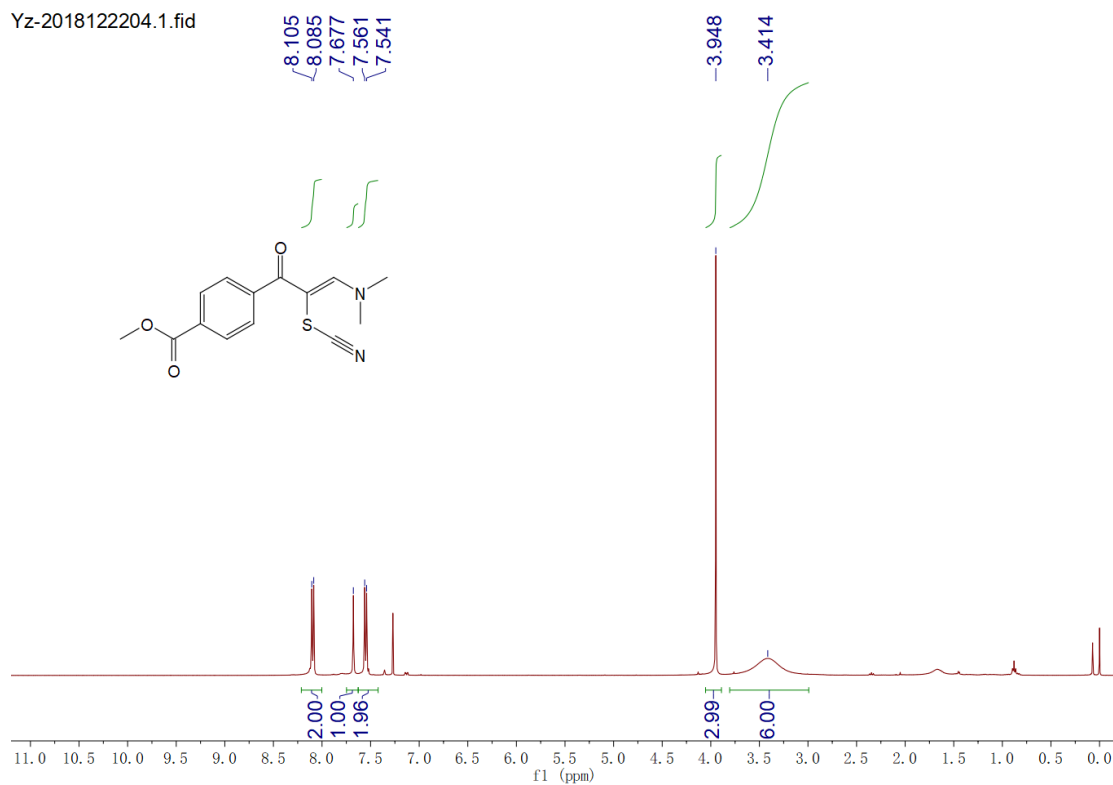

Yz-2018122204.2.fid

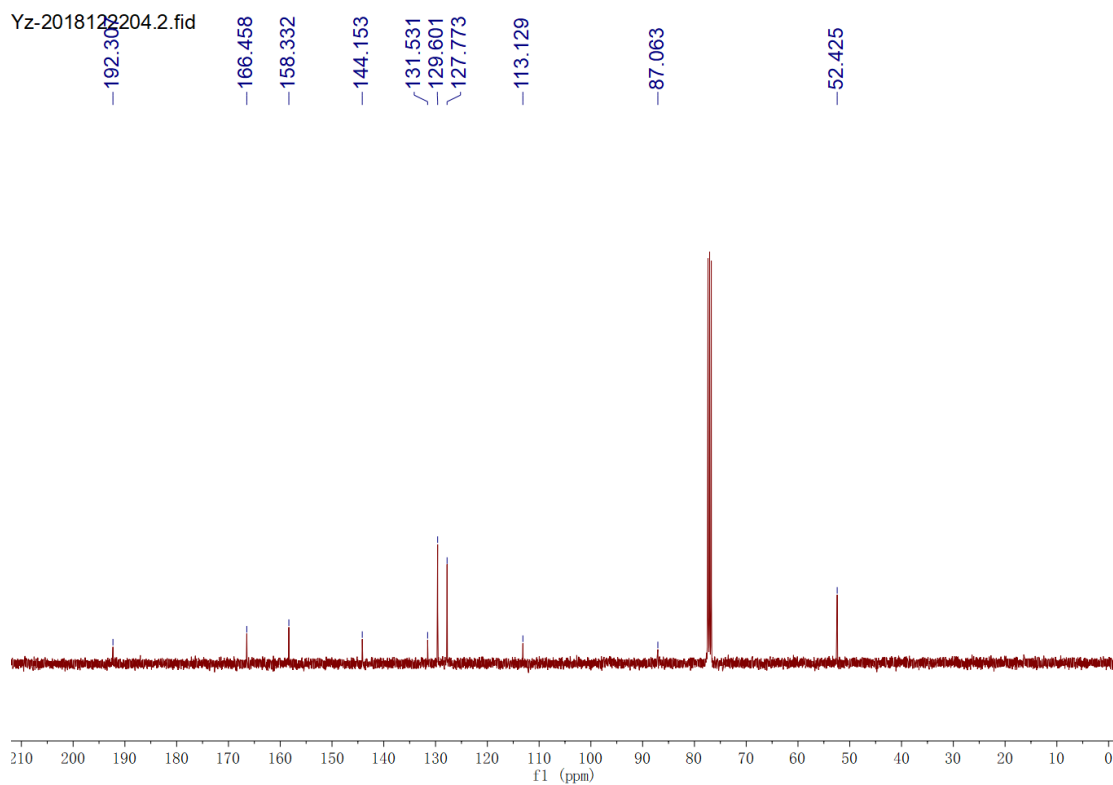

Yz-201901104.1.fid

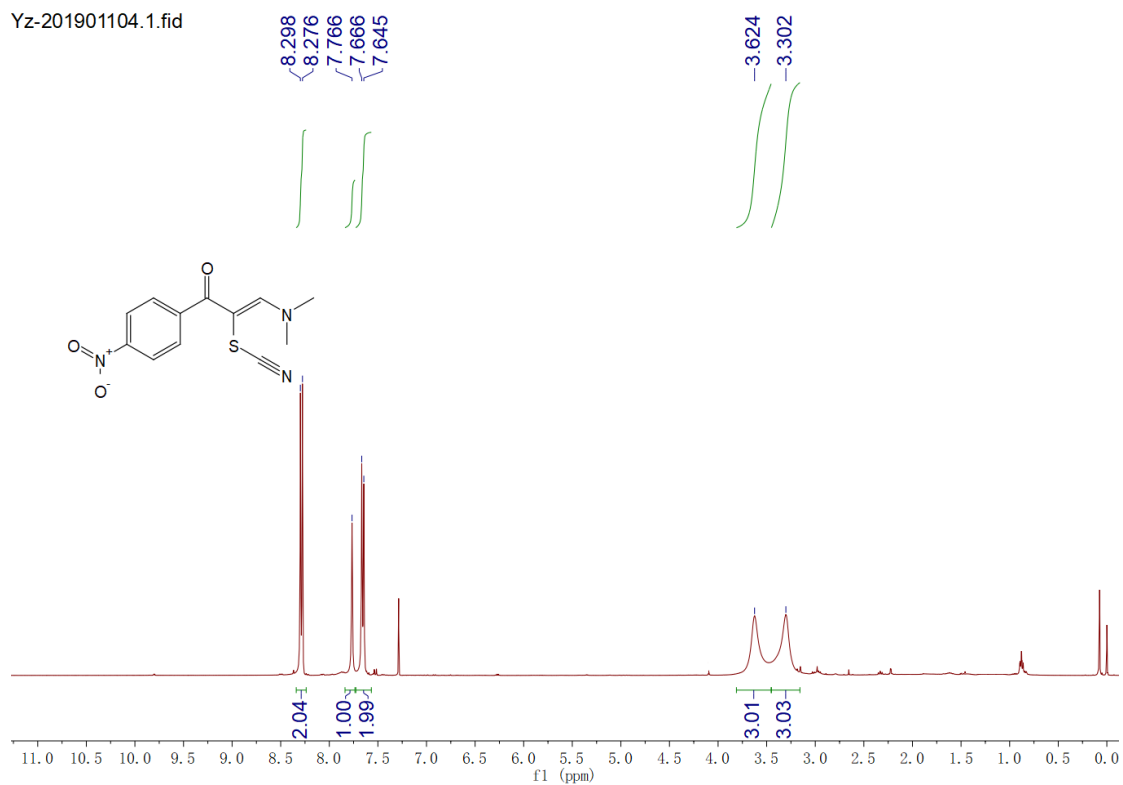

Yz-201901104.2.fid

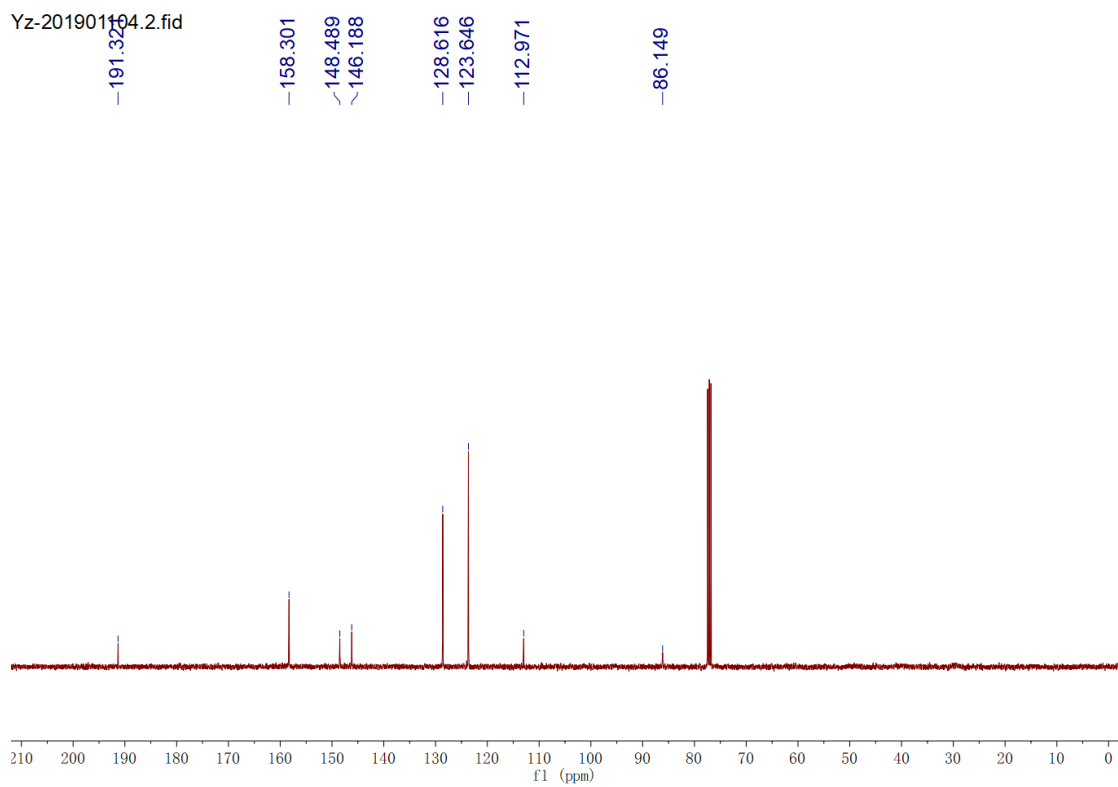



Yz-2019022303.1.fid

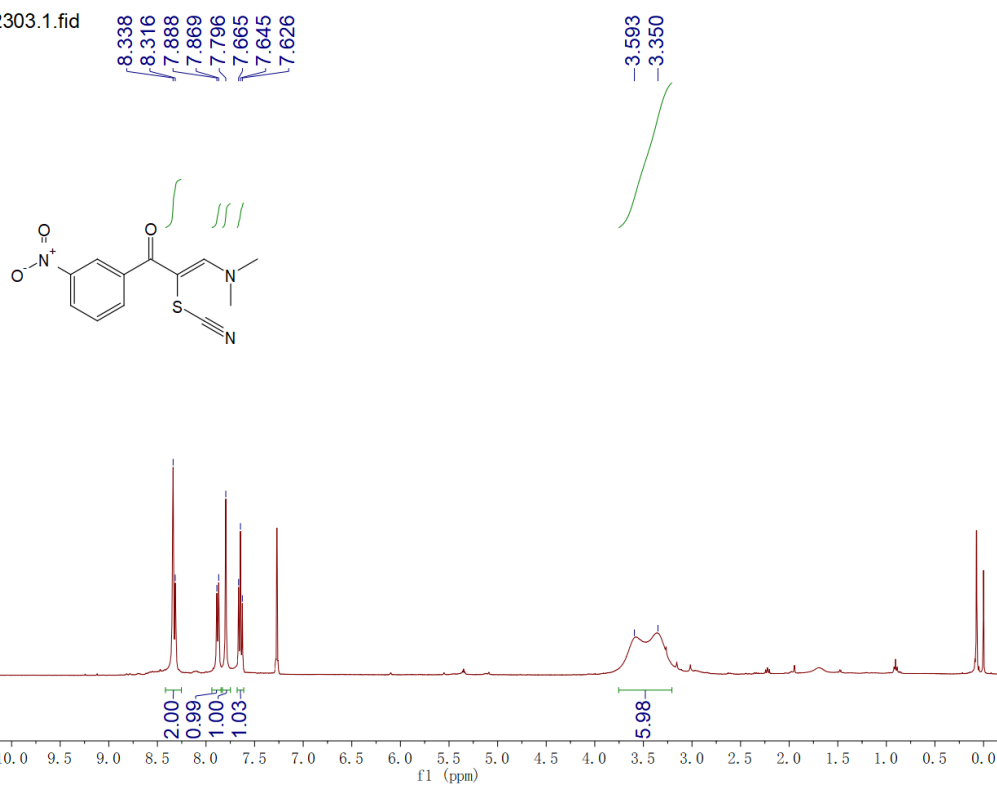

Yz-2019022303.2.fid

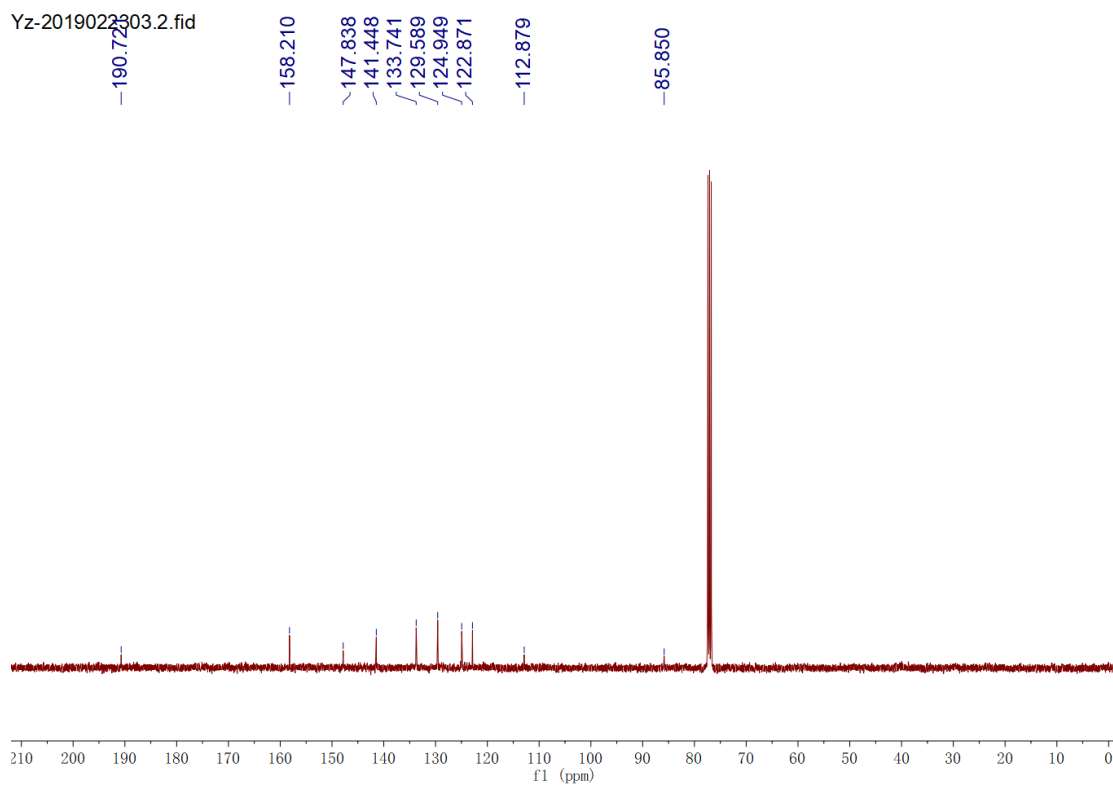

Yz-2019011606.1.fid

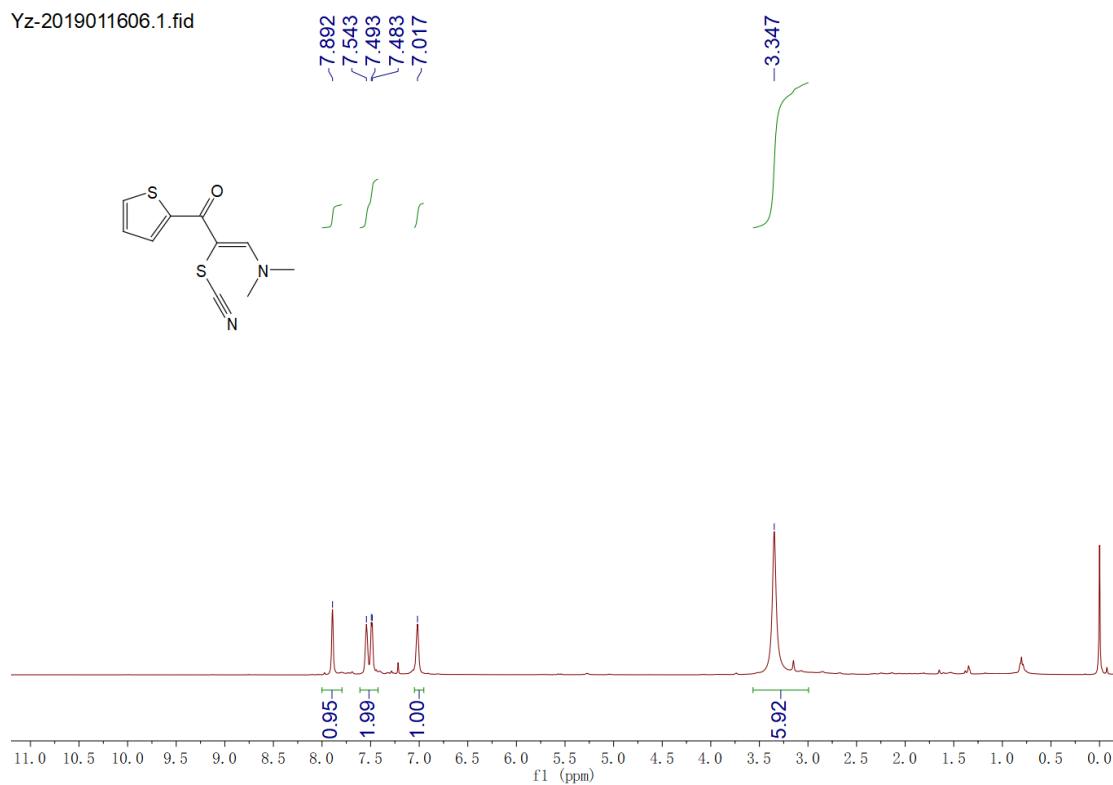

Yz-2019011606.2.fid

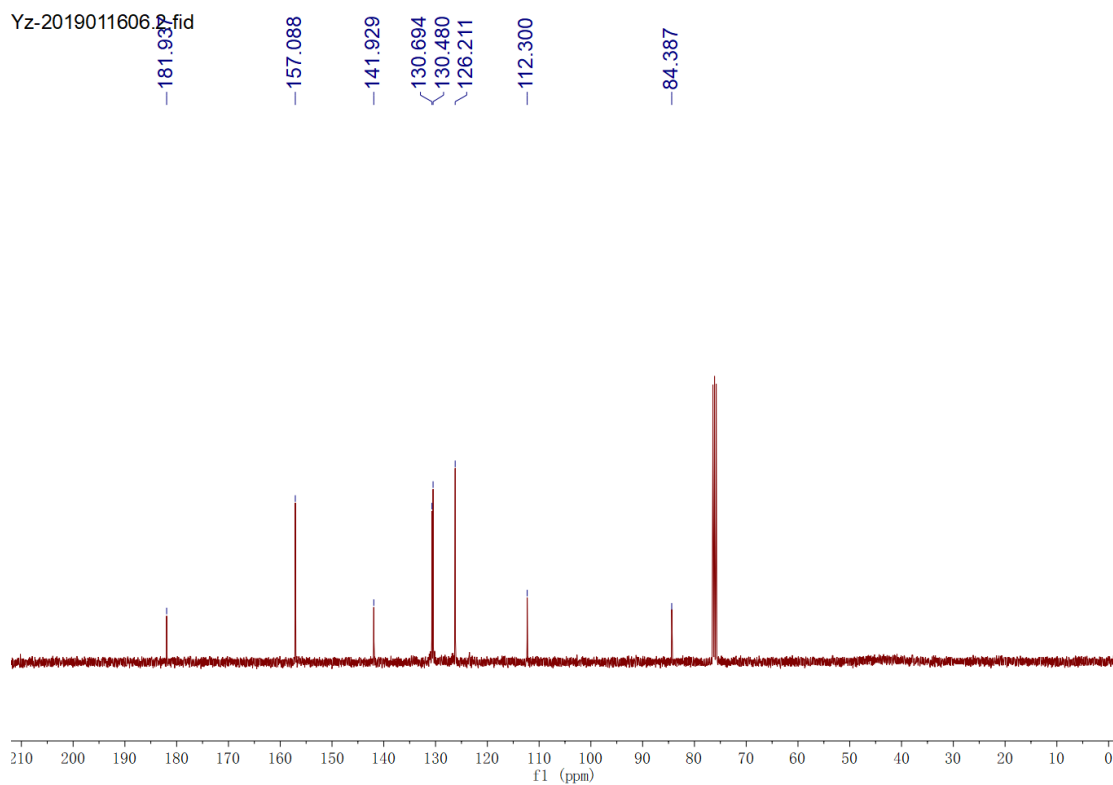

Yz-2019010901.2.fid

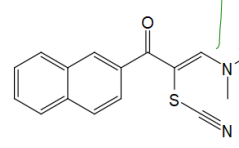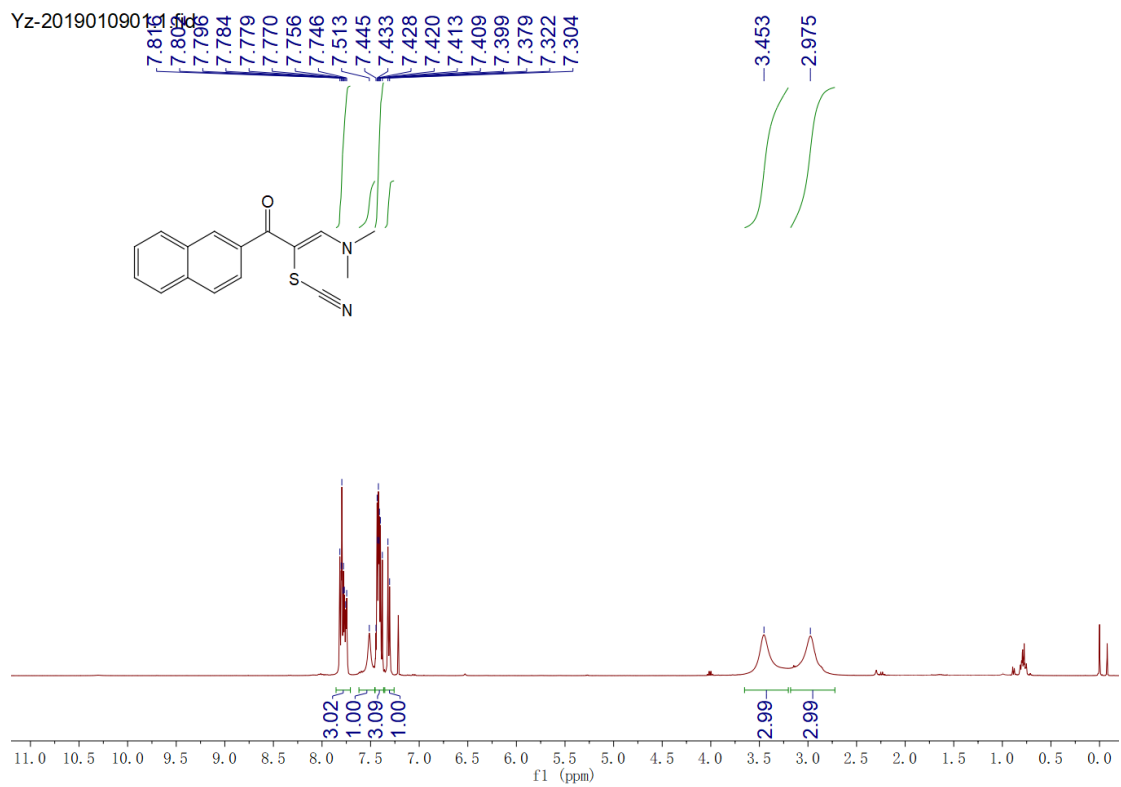

Yz-2019010901.2.fid

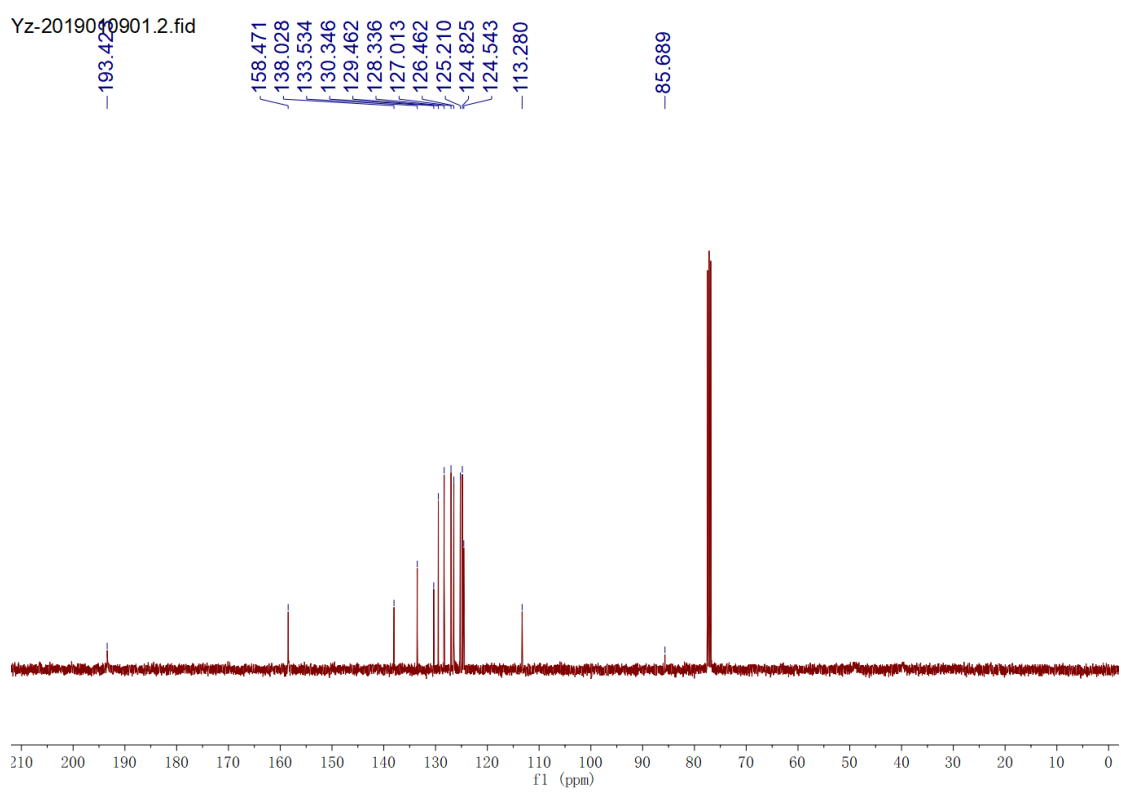

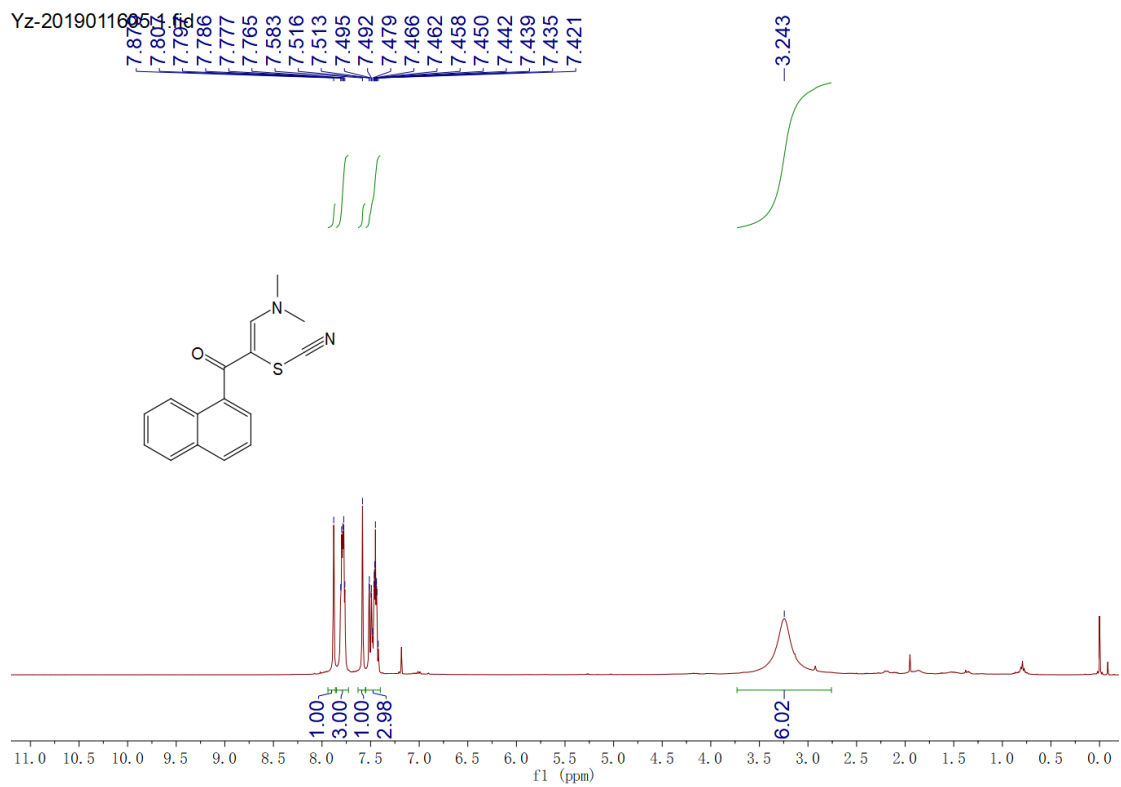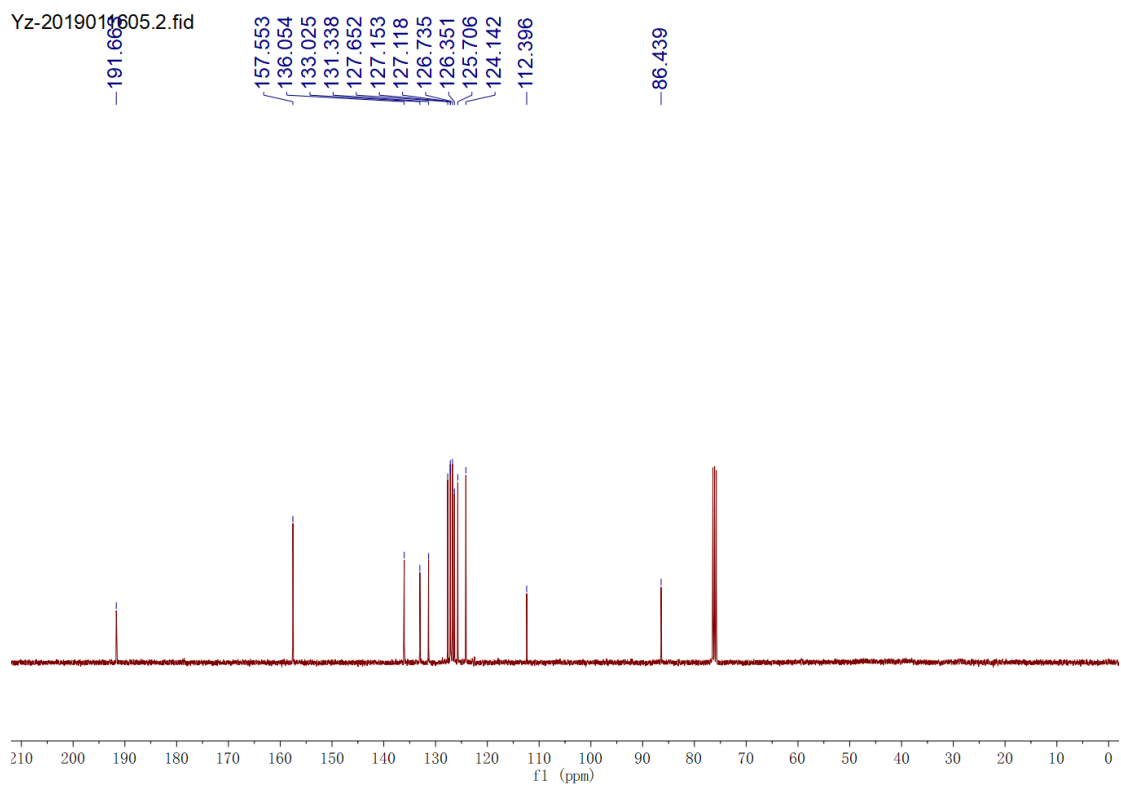

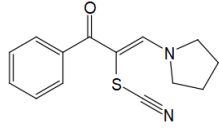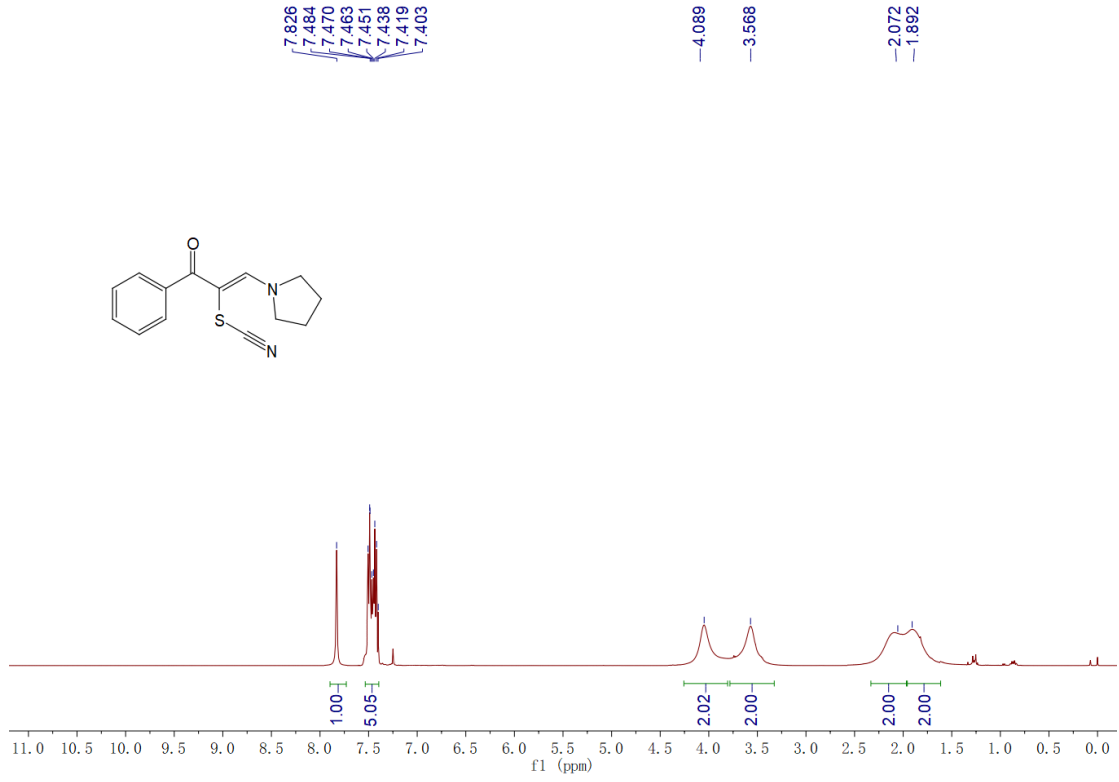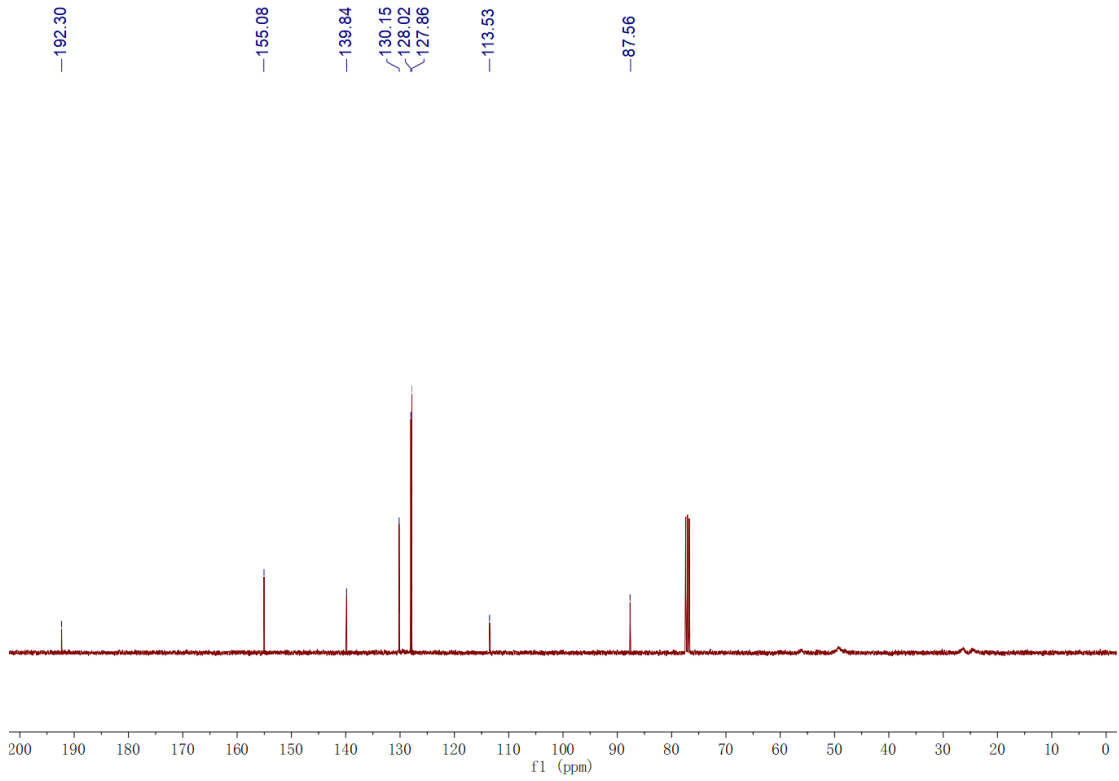

Yz-2018010702.1.fid

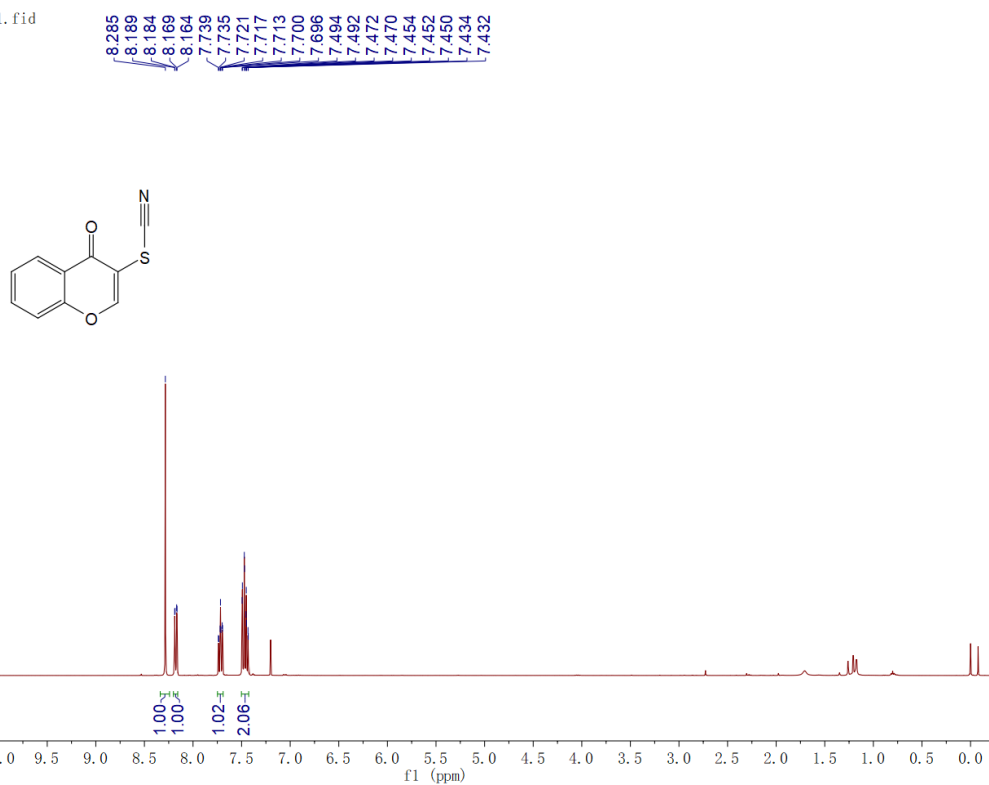

Yz-2018010702.2.fid

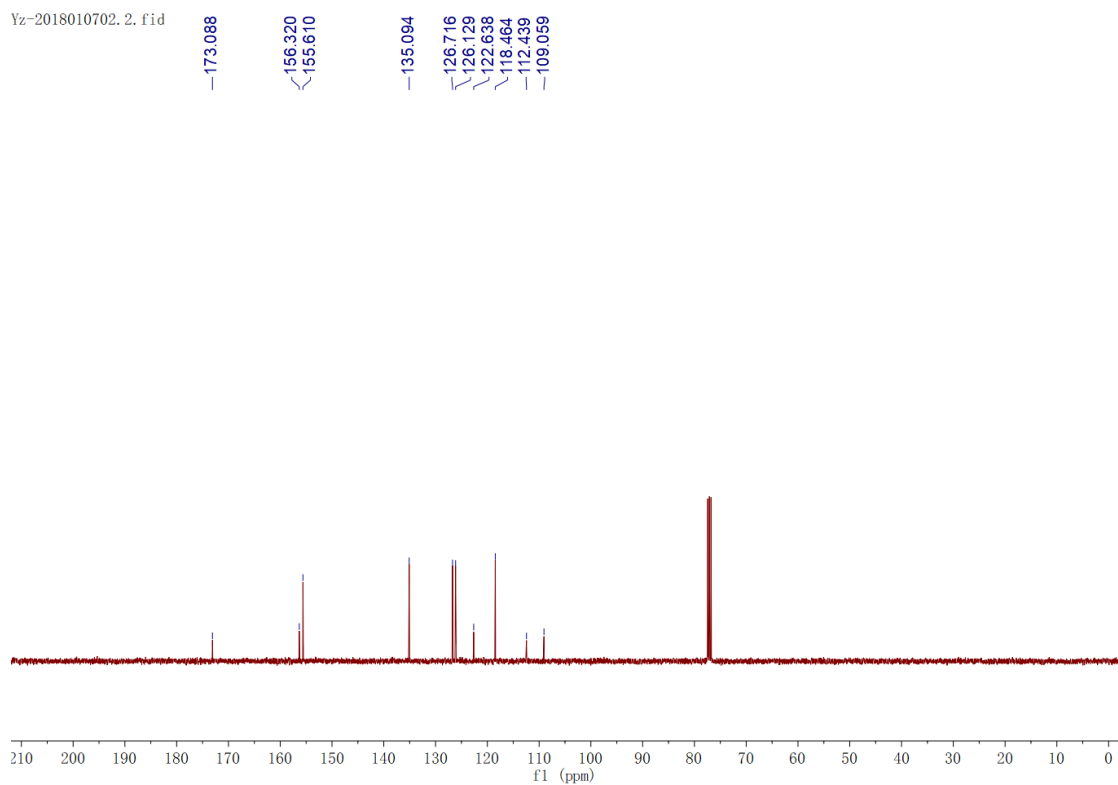

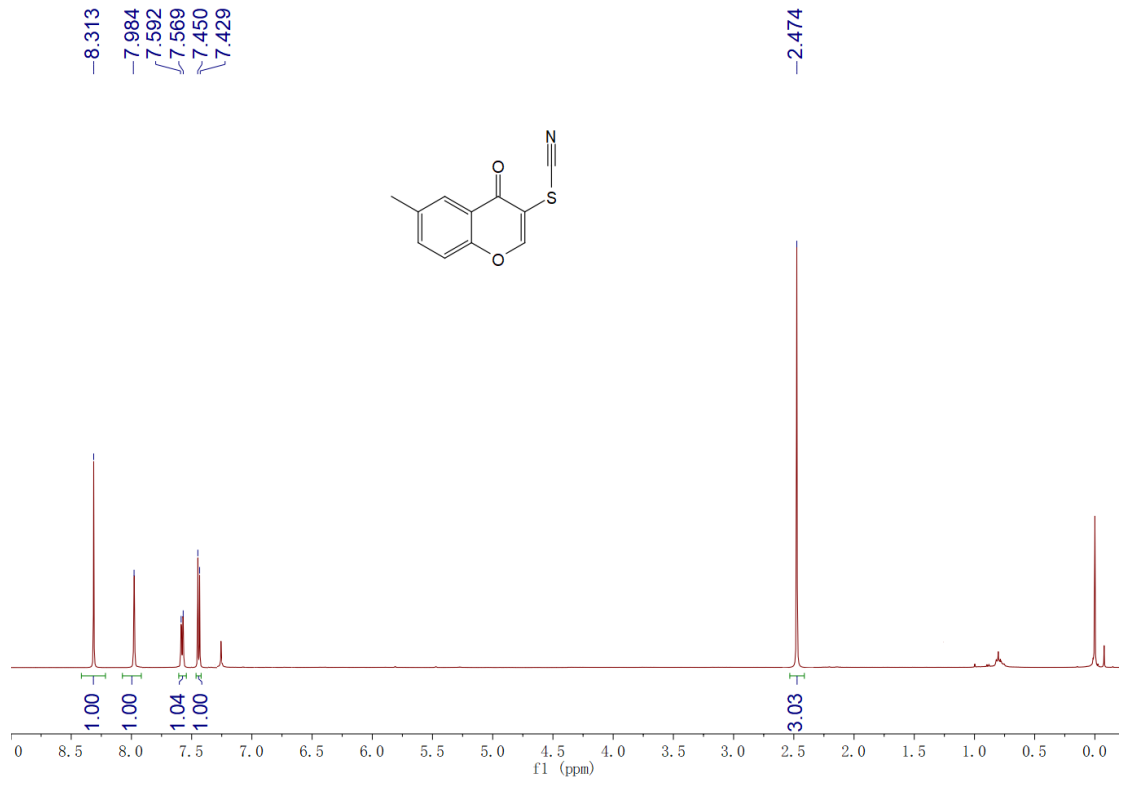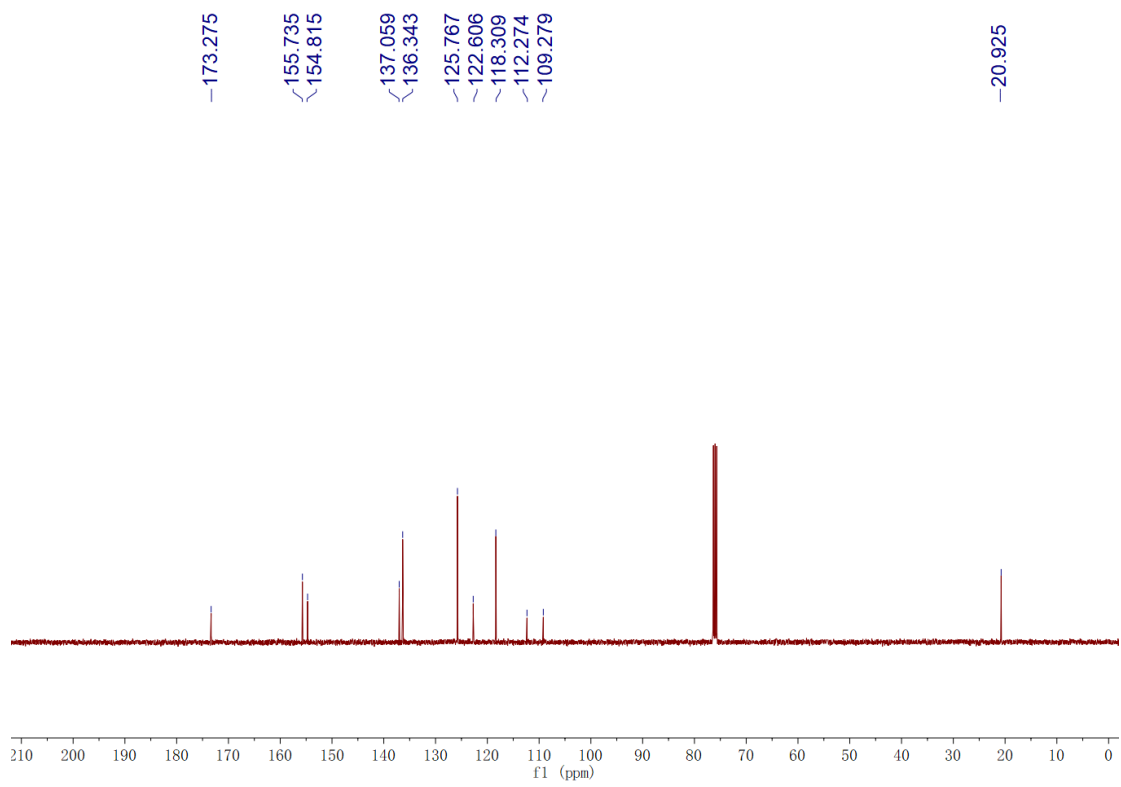

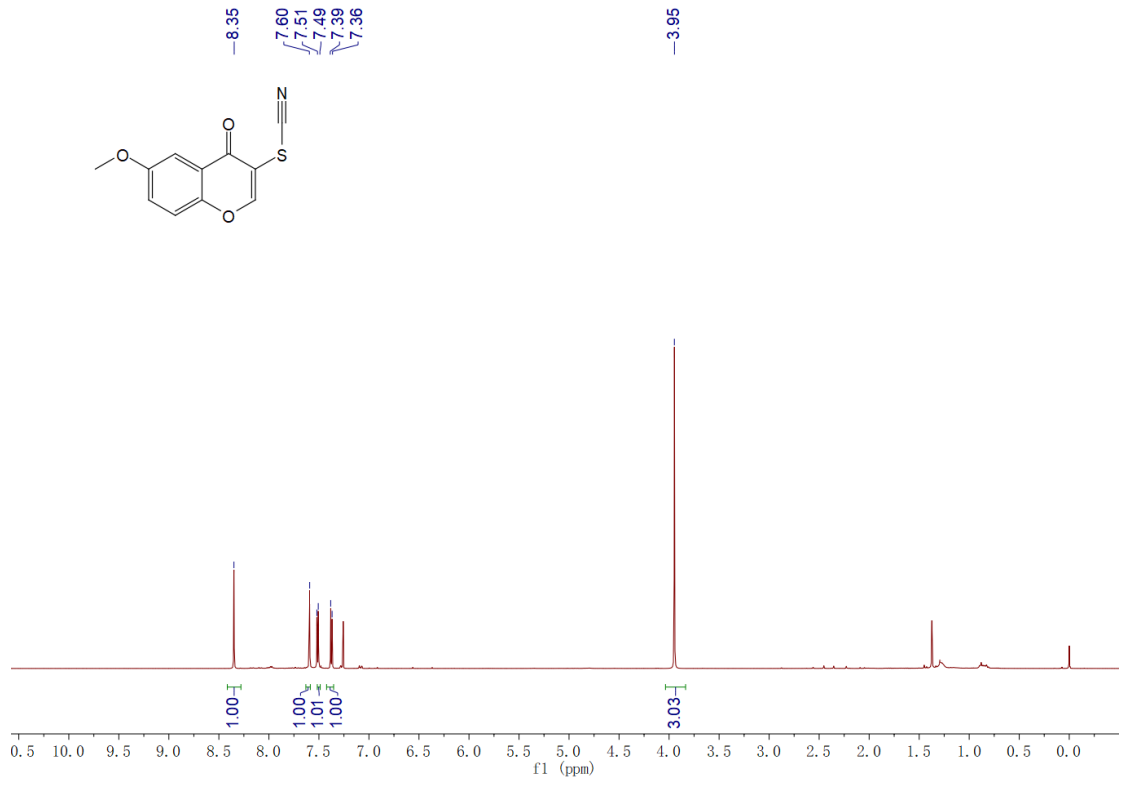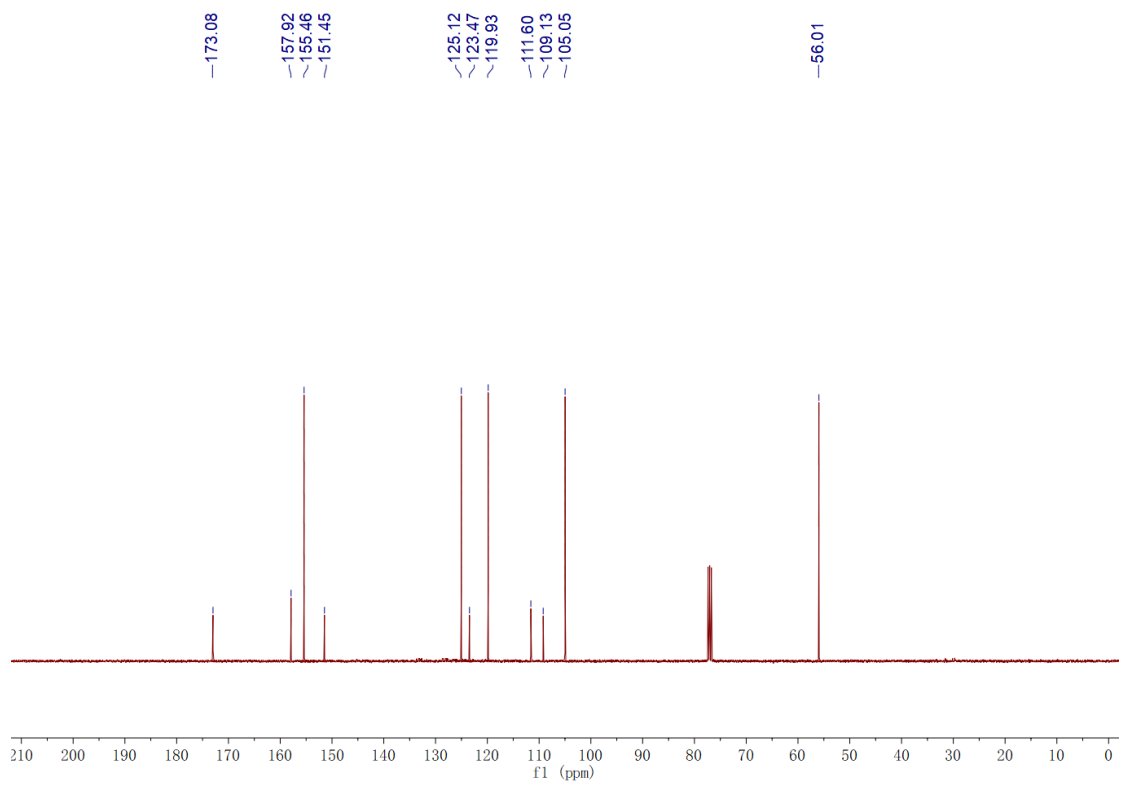



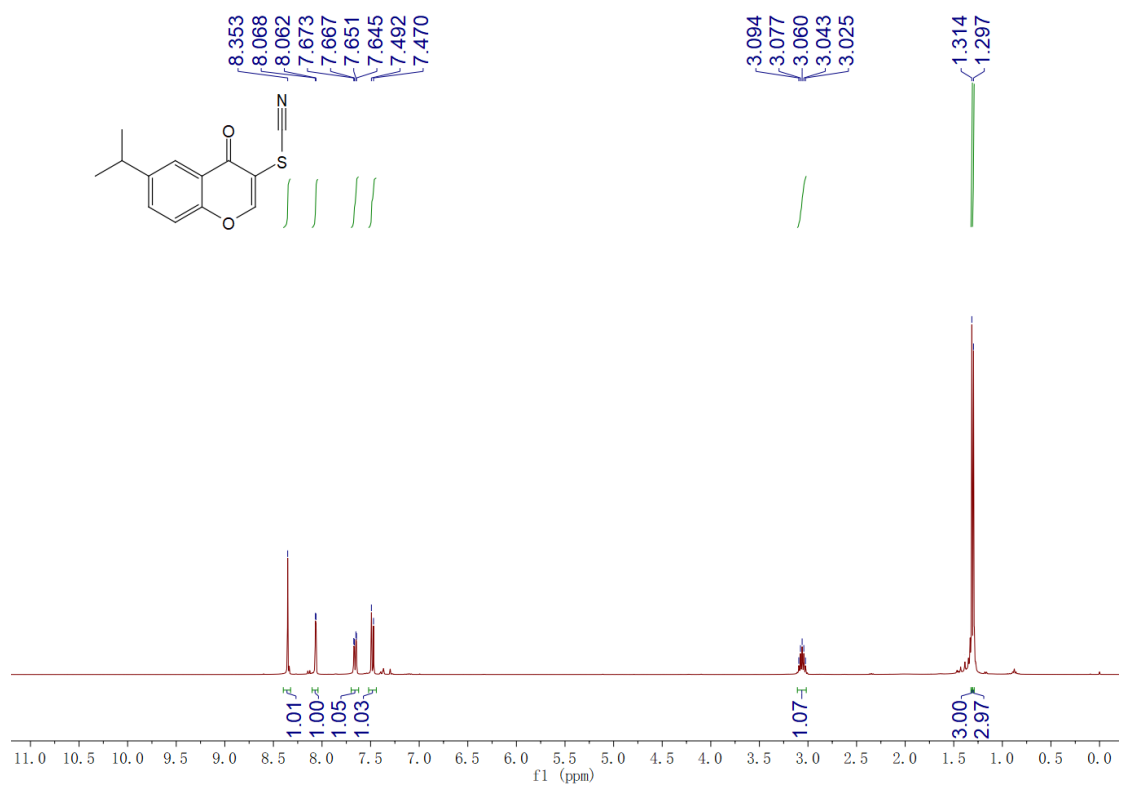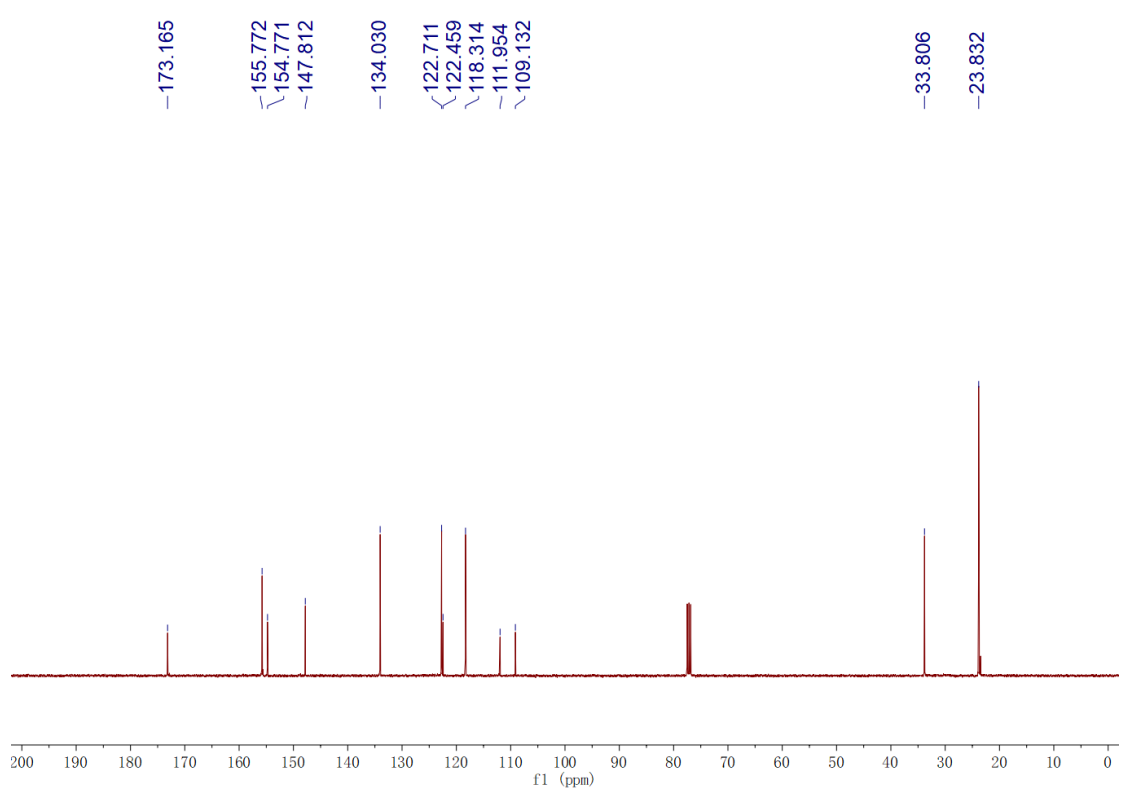

Yz-2019011711.1.fid

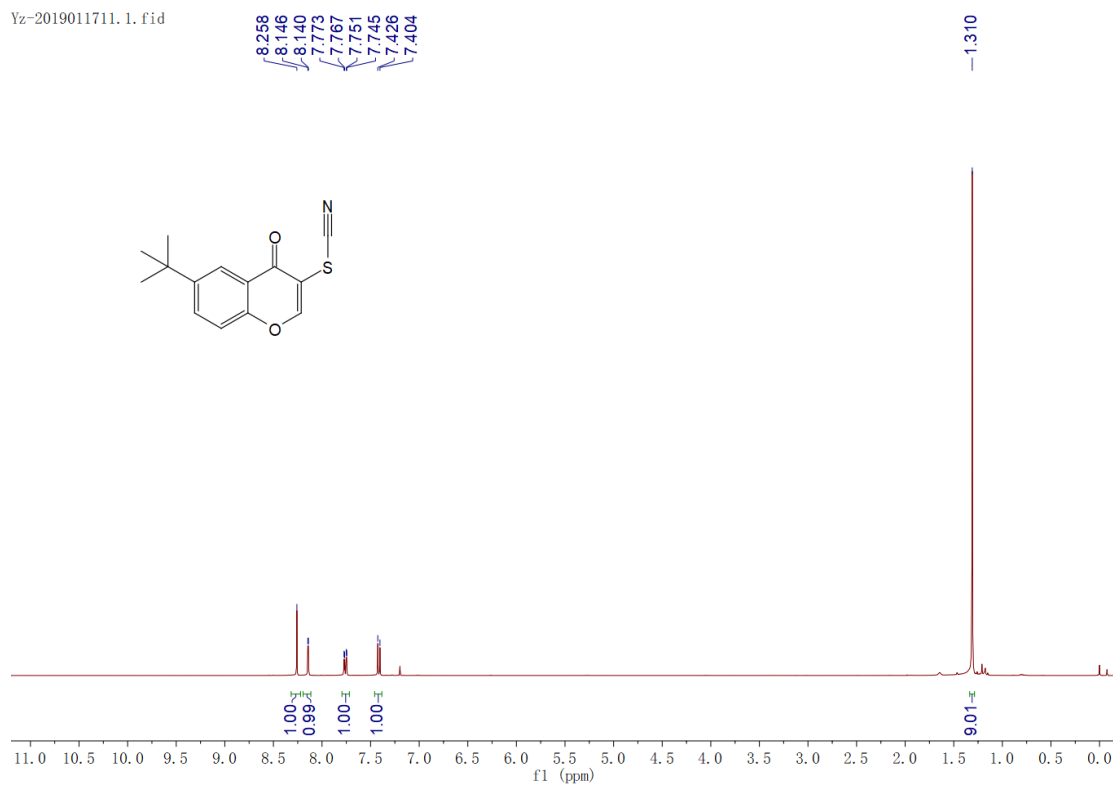

Yz-2019011711.2.fid

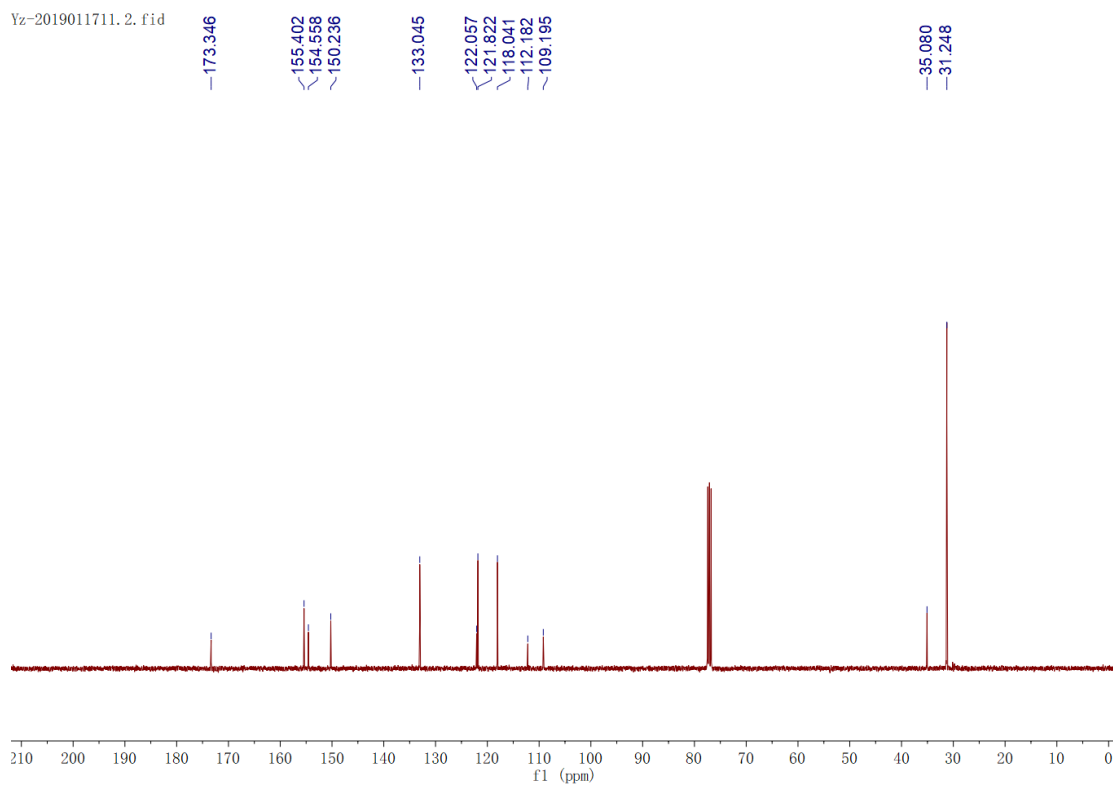

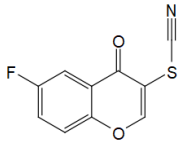

7.893  
7.886  
7.873  
7.866  
7.606  
7.595  
7.582  
7.572  
7.537  
7.529  
7.519  
7.514  
7.511  
7.506  
7.495  
7.488

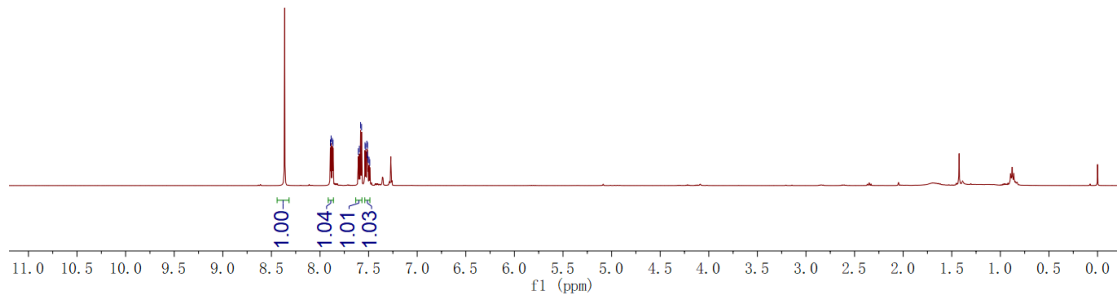

172.372  
172.349  
161.413  
158.930  
155.674  
155.652  
152.613  
152.595  
124.383  
123.920  
123.841  
123.520  
123.485  
123.267  
120.811  
120.728  
112.121  
111.204  
110.965  
108.683

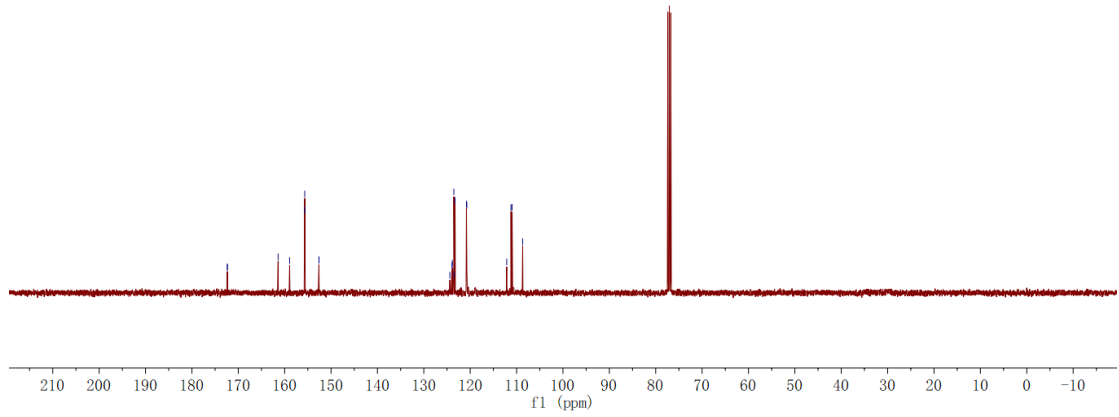

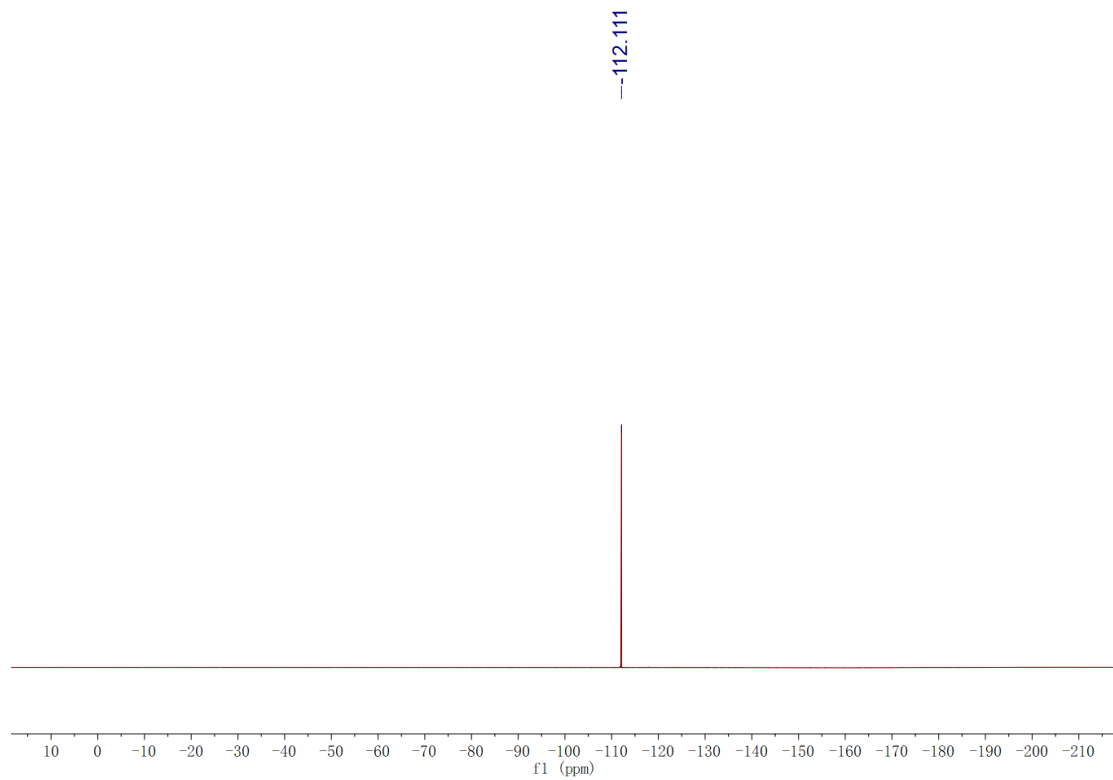

8.356  
8.188  
8.186  
7.746  
7.735  
7.724  
7.540  
7.522

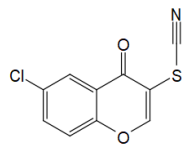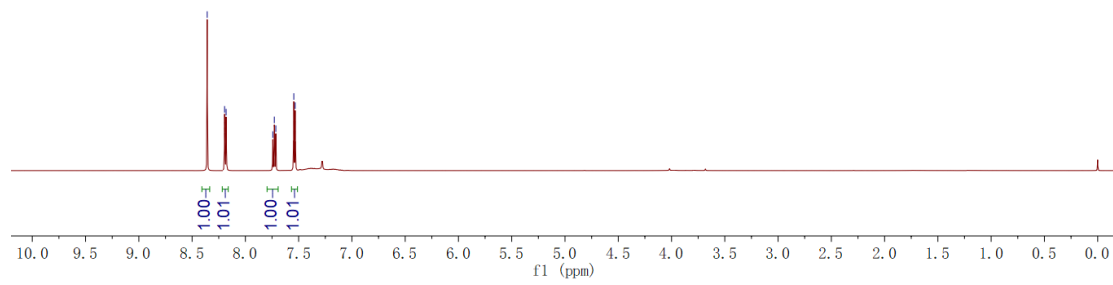

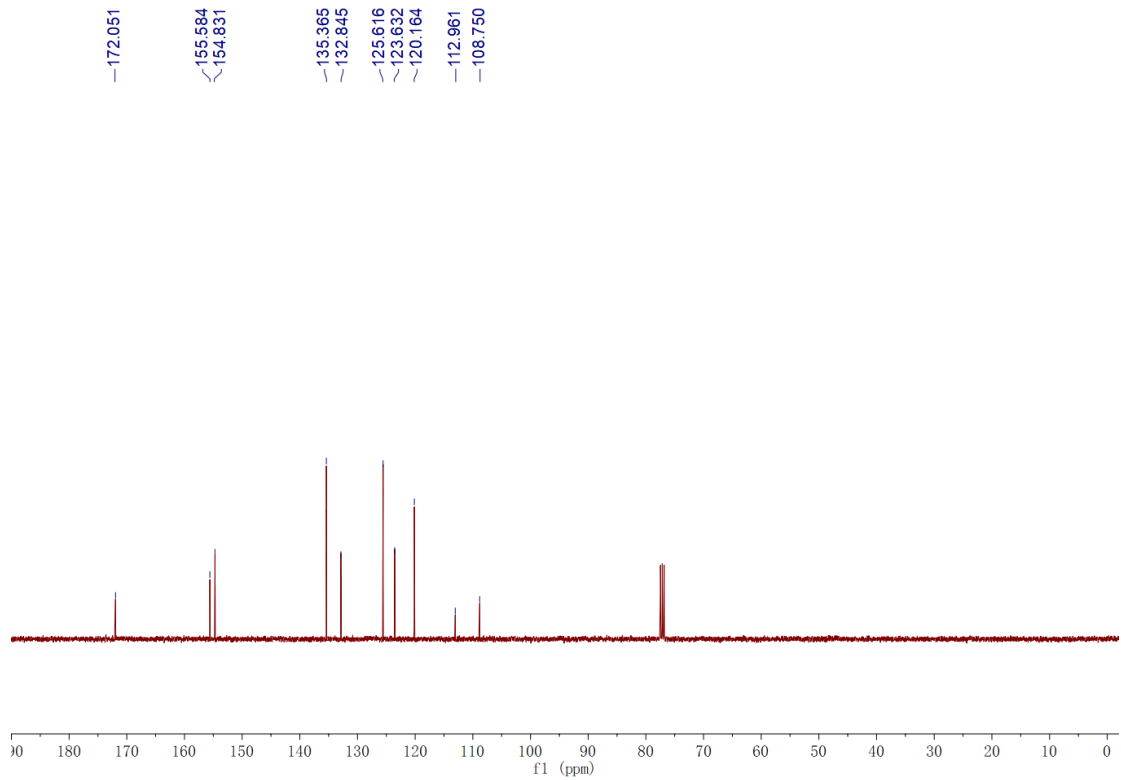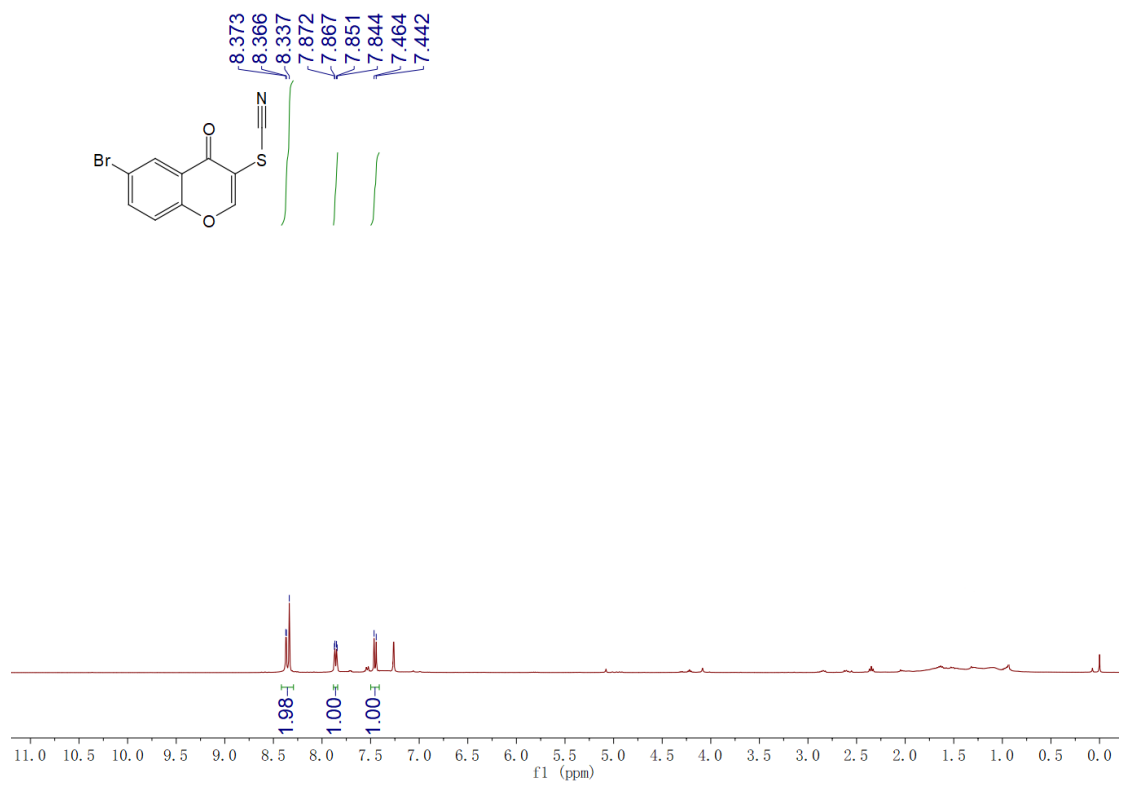

-171.82  
-155.32  
-155.10  
-138.06  
-128.67  
-123.82  
-120.34  
-120.23  
-113.02  
-108.56

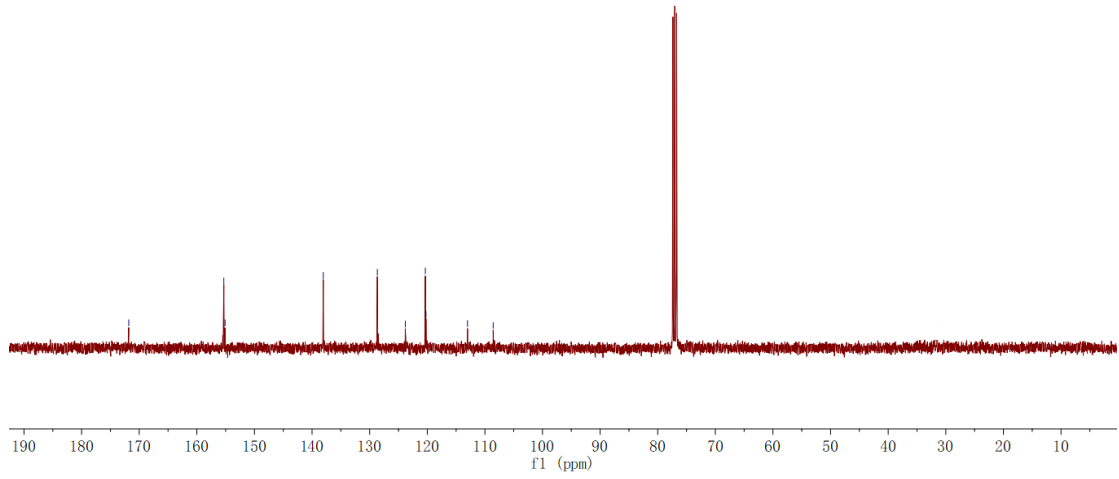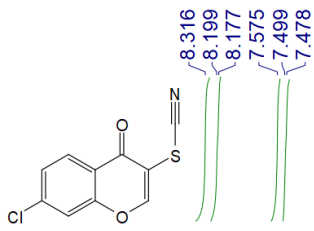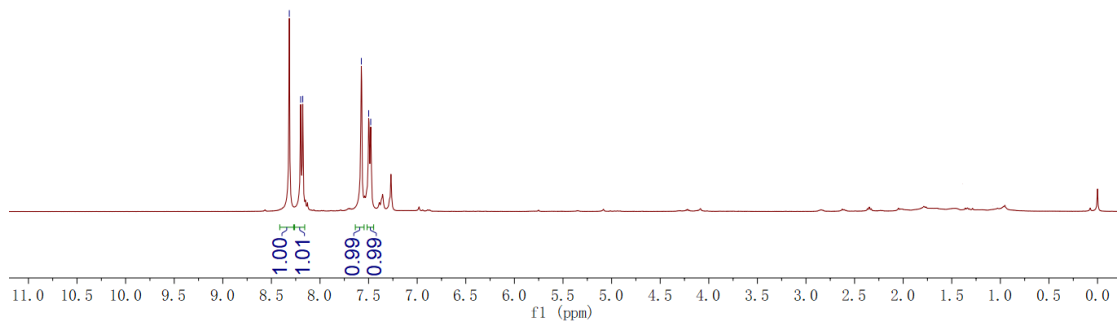

-172.250  
 ~156.379  
 ~155.182  
 -141.347  
 ~127.603  
 ~127.464  
 ~121.107  
 ~118.512  
 ~113.275  
 ~108.602

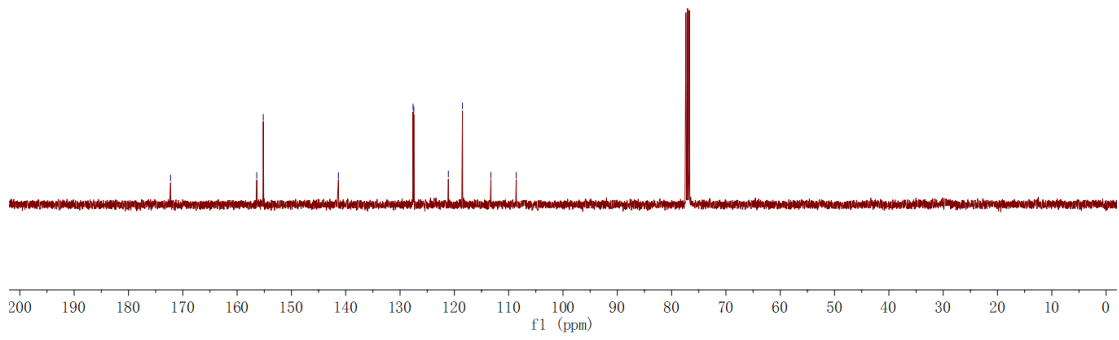

Yz-2019022501.1.fid  
 SeCN

8.267  
 8.205  
 8.201  
 8.185  
 8.181  
 7.813  
 7.809  
 7.795  
 7.792  
 7.788  
 7.774  
 7.770  
 7.575  
 7.554  
 7.534  
 7.514  
 7.496

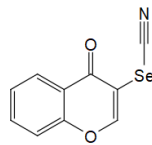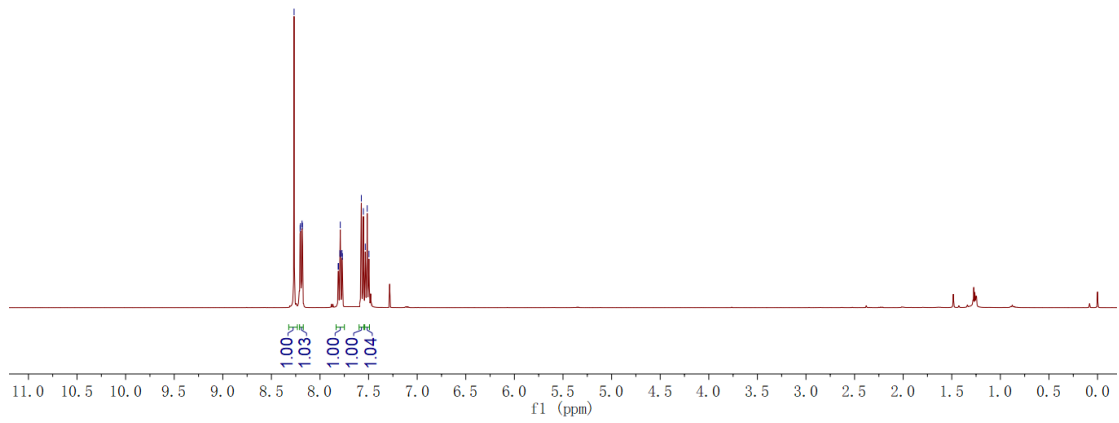

Yz-2019022501.2.fid  
SeCN

-174.187  
-156.616  
-153.155  
-135.029  
-126.467  
-125.762  
-121.910  
-118.501  
-112.607  
-99.983

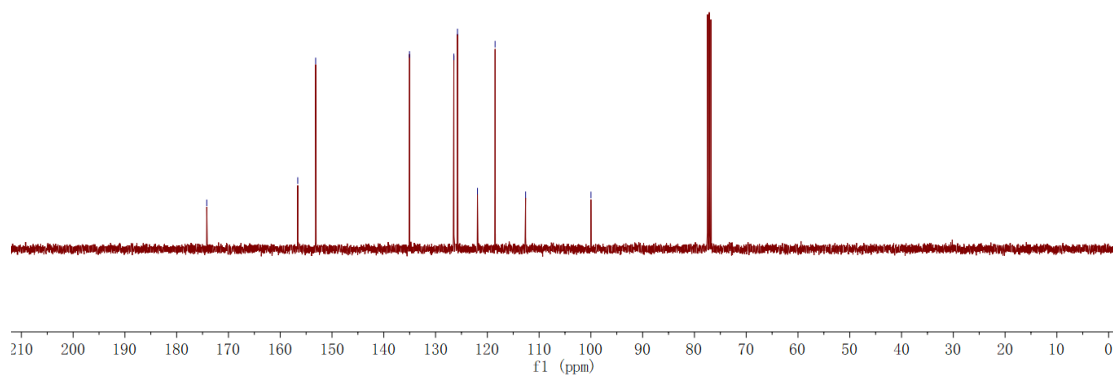

Supplement: c9nj04580e1.pdf [file c9nj04580e1.pdf]
